# Supplementary material for: Glycemic Control and Prostate Antigen Levels in Individuals with Diabetes Based on NHANES Data
Source: Research Square preprint supplement (doi:10.21203/rs.3.rs-5674422/v1), 2025-03-31
Supplement: Supplementary file 1 [file 052d096d5eaf4c3fe9b19bb2.xlsx]

## Sheet: Sheet1
SEQN	Age	Race/Ethnicity	Education Level	Marital Status	PIR	BMI	HbA1c	CRP	tPSA	fPSA	PSA ration	OGTT	Fasting Glucose	Smoking	Alcohol	Hypertension	Diabetes	Coronary disease	Enlarged prostate	WTINT2YR	WTMEC2YR	insulin	pills
40575	85	3	1	1	1.71	25.94	7.3	1.85	1.12	0.59	53	17.541	9.27	2	1	2	1	2	2	8437.71	8795.41	2	2
51212	43	1	1	1	3.1	30.54	6.1	0.23	1.8	0.22	12	10.322	4.989	1	1	2	1	2	2	6117.21	6561.12	2	1
51783	42	2	1	1	1.21	22.78	10	0.41	1	0.33	33	21.883	13.089	1	1	2	1	2	2	2710.42	2907.11	2	1
57892	53	4	1	1	5	28.38	7.9	0.34	0.9	0.47	52	18.241	9.906	1	1	2	1	2	1	11003.3	11520.1	2	1
14829	85	2	1	1	4.26	27.64	7.5	0.19	0.6	0.17	28	12.823	7.161	1	1	2	1	2	2	24376.5	26781.4	1	2
39098	72	3	1	1	0.61	16.97	11.7	0.34	0.2	0.04	20	17.305	9.489	1	1	2	1	2	2	10752.8	10558.2	2	1
40585	61	1	1	1	1.14	24.13	5.2	0.26	6.16	1.82	30	11.158	4.94	2	1	2	1	2	1	20926	22984.6	2	1
43019	60	3	1	1	1.14	28.49	6.5	0.07	5.2	1.88	36	16.422	8.863	2	1	2	1	2	2	7789.55	8216.35	1	2
48223	56	3	1	1	2.09	26.36	5.3	0.07	10.54	4.14	39	11.713	5.495	1	1	2	1	2	2	4718.56	7159.4	2	1
10545	53	2	1	1	2.21	24.21	7.3	0.09	1.78	0.77	43	17.288	9.791	2	1	2	1	2	2	3251.36	4483.27	2	1
51197	58	1	3	2	0.93	27.88	6.6	0.3	0.9	0.13	14	22.077	11.794	1	1	2	1	2	1	6033.61	6404.54	1	1
58316	73	2	2	2	1.24	26.11	6	0.54	3.6	1.01	28	12.115	5.639	1	2	2	1	2	2	3120.99	3300.96	1	2
50466	64	4	2	2	3.78	25.56	7.4	0.09	4.83	1.72	36	15.665	8.715	1	1	2	1	2	2	22477.3	22911.3	2	1
56916	53	3	2	2	2.77	30.01	8.2	0.38	4.79	1.45	30	16.294	9.566	2	2	2	1	2	2	9369.94	9677.09	2	1
52366	49	3	2	2	2	22.86	6.1	0.61	0.48	0.1	21	12.99	6.328	1	1	2	1	2	2	10235.7	10303.4	2	1
42180	74	3	1	2	1.25	28.96	6.7	0.46	0.16	0.09	56	12.878	7.216	1	2	2	1	2	1	21053.8	22867.7	2	1
11607	72	3	1	2	2.4	26.69	6.4	0.29	0.36	0.16	44	14.269	7.383	2	2	2	1	2	2	23504	23957.8	2	1
13142	70	3	1	2	4.12	22.46	6	0.31	0.14	0.08	57	16.042	5.94	2	1	2	1	2	1	21378.3	21791.1	2	2
12696	66	3	1	2	4.06	30.48	7.1	0.27	2.43	0.83	34	15.021	7.161	2	1	2	1	2	1	20784.2	21012.9	2	1
37717	61	1	1	2	5	26.18	5.7	0.05	1.69	0.38	22	13.322	6.661	1	2	2	1	2	1	21833.9	22530.3	2	1
50603	62	3	1	2	0.96	22.77	5.7	0.52	0.61	0.1	16	12.434	5.662	2	1	2	1	2	1	12852.3	12993.7	2	1
56599	70	2	1	2	1.17	27.04	7.3	1.12	2.36	0.75	32	10.23	3.886	1	2	2	1	2	2	14644.6	14927.3	1	2
42368	60	2	1	2	2	22.14	7.3	0.02	2.17	0.53	24	17.327	9.552	1	1	2	1	2	2	20061	23005.2	2	1
32924	53	4	1	2	1.09	23.2	6.9	0.11	0.5	0.12	24	17.097	8.327	2	1	2	1	2	2	5751.07	6318.22	2	1
61531	50	1	1	2	0.91	27.75	8.1	1.38	1.8	0.35	19	16.241	8.66	1	1	2	1	2	2	12668	12864.8	2	1
44206	45	1	1	2	1	21.71	6	0.11	2.27	0.87	38	14.821	6.051	1	1	2	1	2	1	11088	11411.2	2	1
18804	76	1	2	2	2.47	26.3	9.5	0.19	0.43	0.24	56	28.407	18.54	2	1	2	1	2	2	6468.35	7360.98	2	1
60948	68	4	2	2	2.63	27.9	6.7	0.09	1.04	0.39	38	14.776	8.049	2	2	2	1	2	2	8243.17	8404.41	2	1
38689	62	4	1	2	2.26	22.89	13.1	0.27	0.95	0.09	9	27.019	17.319	1	2	2	1	2	2	6391.85	7273.92	2	2
32355	63	1	1	2	0.84	29.12	5.3	1.17	3.3	0.71	22	11.046	5.995	1	1	2	1	2	2	15485.9	15809.7	2	1
37388	73	3	3	2	3.39	26.14	5.9	0.28	3.67	0.51	14	16.79	9.712	1	1	2	1	2	2	29384.5	29418.5	2	1
48729	80	3	2	2	5	23.46	6.2	0.02	0.8	0.24	30	14.433	7.272	1	1	2	1	2	1	33131.4	33464.1	2	2
58024	68	3	2	2	5	28.42	8.6	2.2	5.4	2.13	39	21.108	12.022	1	2	2	1	2	1	24188.7	25718.1	2	1
52065	66	1	2	2	2.24	28.82	6.5	0.24	1.16	0.34	29	16.348	7.69	1	1	2	1	2	1	11530.6	12352.5	1	1
35214	50	3	2	2	2.02	29.56	11.5	0.17	10.2	2.65	26	28.535	18.822	2	1	2	1	2	2	25845.9	27059.7	2	1
35473	49	4	2	2	2.86	26.26	8.4	0.02	0.29	0.09	31	15.516	7.05	1	1	2	1	2	1	30137	32585.1	1	1
39615	46	3	2	2	3.79	26.07	6.2	0.03	0.26	0.1	38	16.87	9.851	1	1	2	1	2	2	41470.8	41194.6	2	1
13942	85	3	1	2	2.06	43.65	7.8	0.49	0.22	0.07	32	17.307	10.658	1	1	2	1	2	2	6536.55	6807.55	2	1
61987	80	3	1	2	2.35	22.62	6	0.26	2.71	0.76	28	12.703	6.162	1	2	2	1	2	2	7101.45	10310	2	1
55643	80	3	1	2	1.04	31.56	5.6	0.14	4.47	1.1	25	15.729	8.659	1	1	2	1	2	2	6077.3	6792.13	2	1
46936	75	2	1	2	5	27.85	6.8	0.27	1.32	0.26	20	14.299	7.938	2	2	2	1	2	2	31795	31722.5	2	1
49853	67	4	1	2	3.41	20.83	5.4	0.05	1.73	0.41	24	14.322	7.438	2	1	2	1	2	2	48021	48584.1	2	2
59226	64	3	1	2	0.77	39.19	6.9	0.61	0.81	0.15	19	15.358	7.115	1	1	2	1	2	1	9935.27	10270.3	1	1
19639	60	3	1	2	1.63	27.15	5.8	0.42	0.28	0.16	57	14.479	7.605	1	2	2	1	2	2	43488.9	48431.4	2	1
35080	52	3	1	2	3.11	20.6	4.9	0.03	4.16	0.62	15	11.824	6.328	2	1	2	1	2	2	32565.8	32348.9	2	1
18496	48	2	1	2	5	24.34	5.6	0.08	3.23	0.34	11	16.959	10.265	1	2	2	1	2	2	9547.7	9994.13	2	2
46255	75	3	1	2	2.33	37.13	6.5	2.72	3.8	0.65	17	16.068	9.435	2	2	2	1	2	2	9387.63	10313.5	1	2
47455	73	3	1	2	1.24	22.43	6.5	0.1	0.26	0.08	31	14.051	6.772	2	1	2	1	2	2	33006.3	32931	2	1
53971	50	5	1	2	1.17	29.16	8.7	0.18	0.5	0.15	30	16.628	9.168	2	2	2	1	2	2	12872.5	13477	2	1
20528	48	1	1	2	5	22.08	6.1	0.04	3.19	0.84	26	11.491	7.882	2	1	2	1	2	2	6468.35	6658.18	2	1
47947	80	1	1	2	5	28.78	5.8	0.74	15.66	3.98	25	13.878	5.551	1	1	2	1	2	1	48021	48297.5	2	1
51396	76	3	1	2	3.57	37.21	6.6	0.38	0.86	0.41	48	15.099	8.992	2	1	2	1	2	2	36585.9	36072.8	2	1
10763	75	3	1	2	2.19	27.59	5.9	0.1	4.8	1.4	29	15.716	8.884	1	1	2	1	2	2	28153.1	27640.9	2	1
46420	73	1	1	2	2.83	38.46	6.6	0.14	3.9	0.94	24	15.499	7.644	2	1	2	1	2	1	1977.31	2091.32	2	1
41739	69	4	1	2	5	26.39	13.5	0.12	3.86	0.65	17	16.624	10.177	1	1	2	1	2	2	13905.8	14932.5	2	1
50779	69	4	1	2	3.38	25.77	8.1	0.03	7.67	3.2	42	20.692	11.269	2	2	2	1	2	1	12184.2	12980.7	1	1
36719	69	3	1	2	5	26.59	12.9	0.1	0.68	0.22	32	16.307	9.856	1	1	2	1	2	2	11383	11721.2	1	2
38755	67	3	1	2	3.79	26.5	5.9	0.05	6.14	2.38	39	16.215	7.974	1	1	2	1	2	1	40704.5	41181.8	2	1
37147	60	1	1	2	2.28	28.99	8.6	0.13	8.1	2.65	33	16.065	8.866	1	1	2	1	2	2	24148.4	25282.5	2	1
53949	48	2	1	2	1.42	23.43	6.6	0.35	17.45	0.62	4	13.378	7.272	1	1	2	1	2	2	7697.3	7802.3	2	1
59659	80	3	3	2	3.07	25.81	9	0.2	2.08	0.43	21	31.03	21.649	2	2	2	1	2	2	10181.5	10854.1	1	2
11961	69	4	3	2	2.59	31.91	5.8	0.22	0.74	0.26	35	11.269	6.217	1	1	2	1	2	2	33102	32499.8	2	1
55268	68	3	3	2	5	36.16	6.8	0.95	0.5	0.21	42	14.07	8.628	1	1	2	1	2	2	1913.81	2097.42	2	1
50774	65	3	3	2	2.33	27.2	6.3	0.04	4.27	0.92	22	16.73	9.391	2	1	2	1	2	2	4718.56	6850.48	2	1
14749	64	1	3	2	2.5	25.65	6.2	0.14	1.8	0.47	26	12.641	5.95	1	1	2	1	2	2	3603.66	3637.87	2	1
44487	62	3	3	2	5	32.42	6.5	0.11	3.3	0.67	20	15.596	7.993	1	1	2	1	2	1	6407.08	6449.49	2	1
49050	61	3	3	2	2.04	31.32	7.6	0.09	0.88	0.31	35	13.711	7.605	1	2	2	1	2	2	8314.19	8163.71	2	1
18355	56	3	3	2	1.2	29.19	7.7	0.29	1.66	0.19	11	12.692	6.217	1	1	2	1	2	2	12084.9	14119.2	2	1
60220	53	3	3	2	5	24.45	7.3	0.24	1.4	0.46	33	16.164	9.723	2	1	2	1	2	2	23624.1	26210.3	1	2
39429	50	3	3	2	3.93	20.56	9.8	0.04	1.45	0.28	19	17.877	10.935	1	1	2	1	2	2	25771.9	28354.4	2	1
54863	80	3	2	2	1.39	27.59	8.1	0.12	2.2	0.63	29	16.666	9.27	2	1	2	1	2	2	9707.52	9805	2	1
16301	77	3	2	2	3.08	29.53	6.5	0.27	3.18	0.91	29	13.989	7.993	2	1	2	1	2	2	27519.8	27796.1	2	2
53946	63	4	2	2	1.83	30.74	6.5	0.22	0.78	0.25	32	15.967	8.964	1	1	2	1	2	2	5915.65	6041.54	1	2
37382	58	4	2	2	3.74	25.34	6.7	0.08	36.9	4.27	12	17.628	8.629	2	1	2	1	2	1	11283.1	11078.9	2	1
54401	52	1	2	2	2.31	20.79	9.8	0.45	0.89	0.47	53	16.698	9.104	2	1	2	1	2	2	28197.5	28480.7	1	2
59028	47	1	2	2	2.91	39.89	6	0.06	0.25	0.1	40	11.345	6.162	1	2	2	1	2	2	21970.5	21662.4	2	1
50021	80	3	1	2	1.03	30.58	6.8	0.05	0.2	0.08	40	16.501	9.013	2	2	2	1	2	2	11870.3	14486.5	2	1
17987	61	1	1	2	1.95	28.81	4.9	0.08	0.79	0.26	33	11.824	6.661	1	1	2	1	2	2	7101.45	9792.11	2	1
10488	46	1	1	2	1.98	31.19	7.8	1.24	29.98	4.44	15	16.689	7.827	1	1	2	1	2	1	3251.36	4313.27	2	1
52688	67	1	1	2	2.99	24.38	12.2	0.03	5.92	1.16	20	16.651	9.73	2	2	2	1	2	2	6009.67	5819.72	1	1
51466	57	1	1	2	5	28.77	6.5	0.39	0.1	0.05	50	16.915	8.779	2	1	2	1	2	1	12001.3	12830.4	2	1
61126	74	3	3	1	3.73	24.8	6.9	0.05	3.2	0.5	16	17.287	8.611	2	2	2	1	2	1	49351.4	54754.1	2	2
55812	72	3	3	1	2.86	33.97	6.6	8.84	1.17	0.22	19	14.71	8.882	1	1	2	1	2	2	30691.4	30324.7	2	2
34575	69	3	3	1	2.73	26.2	6	0.06	8.77	1.11	13	11.213	6.273	2	2	2	1	2	2	7351.05	7591.78	2	1
39953	69	1	3	1	1.73	35.64	7	0.48	6.26	0.95	15	16.022	9.446	1	2	2	1	2	2	7817.36	9034.46	2	1
48337	66	5	3	1	0.47	38.94	6.6	0.39	0.81	0.33	41	15.02	8.209	2	1	2	1	2	2	4510.01	5118.86	2	1
55272	66	5	3	1	5	30.19	6.5	0.09	2.27	0.55	24	16.151	8.327	1	1	2	1	2	1	12399.7	11651.5	2	2
37871	65	3	3	1	3.49	30.56	6.1	0.18	2.85	0.73	26	12.141	6.162	1	1	2	1	2	2	6438.29	6649.12	2	1
55254	65	3	3	1	4.19	24.88	5.5	0.14	1	0.37	37	17.082	10.043	1	1	2	1	2	2	3291.25	4398.82	2	2
53743	65	3	3	1	0.25	23.97	6.1	0.13	0.46	0.21	46	16.149	8.215	2	2	2	1	2	2	18895	18766.1	2	1
54104	65	3	3	1	1.92	22.32	9.6	1.42	5.12	0.73	14	25.979	15.987	1	1	2	1	2	2	9256.57	9660.44	2	1
49087	63	3	3	1	0.87	21.79	5.6	4.42	0.39	0.22	56	13.933	7.216	1	1	2	1	2	2	20889.1	21517.8	2	1
43842	62	2	3	1	1.87	26.47	8.9	0.02	1.32	0.31	23	16.946	9.437	2	1	2	1	2	2	7590.59	8725.71	2	1
46021	62	1	3	1	1.66	28.04	6.6	0.31	1.6	0.34	21	14.192	7.317	2	1	2	1	2	2	3020.77	3310.58	2	1
11459	60	3	3	1	5	27.29	6.9	0.12	1.84	0.41	22	16.175	9.766	2	1	2	1	2	2	53088.3	51939.9	1	2
58740	55	5	3	1	1.41	29.33	5.8	0.09	0.87	0.29	33	12.354	6.606	1	1	2	1	2	2	30691.4	30324.7	2	1
58234	53	3	3	1	1.8	29.37	11.3	0.62	1.11	0.24	22	24.202	15.598	1	1	2	1	2	2	15623.2	14680.5	2	2
17029	51	3	3	1	5	22.04	13.9	0.03	0.49	0.16	33	31.03	22.981	1	1	2	1	2	2	4137.78	4278.34	1	1
60601	51	2	3	1	1.21	27.21	11.1	0.72	1.3	0.26	20	23.973	14.928	1	1	2	1	2	2	3494.29	3624.84	2	1
33775	50	4	3	1	5	28.87	5.9	0.01	0.84	0.3	36	15.922	9.302	2	1	2	1	2	2	50237.6	53538.9	2	1
59754	50	3	3	1	2.35	22.09	7	0.01	1.22	0.28	23	18.78	9.381	2	2	2	1	2	1	15165.3	15520.3	2	1
13244	49	5	3	1	1.72	21.51	9.7	0.05	0.9	0.3	33	15.912	8.746	2	1	2	1	2	2	7415.43	7927.68	2	1
56597	48	3	3	1	1.3	26.95	11.9	0.35	4.5	0.72	16	22.221	13.75	1	2	2	1	2	2	11320.9	12103	2	1
37187	44	4	3	1	2.31	27.62	8.3	0.09	0.53	0.12	23	16.202	8.905	1	1	2	1	2	2	7828.57	7880.26	2	1
57549	43	3	3	1	5	32.3	7.2	0.01	0.42	0.18	43	16.367	8.477	2	2	2	1	2	1	63955.3	68158.1	2	1
14364	81	3	2	1	1.51	28.14	6.1	0.06	1.69	0.61	36	15.673	8.402	1	1	2	1	2	2	8645.94	8929.07	2	1
45982	80	4	2	1	3.49	24.65	10.2	0.25	1.54	0.46	30	18.366	11.046	1	1	2	1	2	2	6438.29	6649.12	2	1
47673	80	3	2	1	5	44.05	7.4	1.04	1.35	0.42	31	14.089	8.702	1	1	2	1	2	2	7492.22	7737.57	2	1
42603	80	3	2	1	2.7	31.17	5.7	0.22	3.68	0.81	22	12.046	6.495	1	1	2	1	2	2	3783.54	4189.02	2	2
53219	80	3	2	1	0.94	39.61	8.3	0.67	0.85	0.13	15	15.027	8.338	2	1	2	1	2	2	4718.56	4878.86	2	1
57474	80	3	2	1	0.35	27.24	7.5	0.77	1.46	0.37	25	18.374	7.494	1	1	2	1	2	2	7384.25	8175.63	2	1
55944	80	1	2	1	1.06	26.51	4.9	1	3.51	0.56	16	14.094	7.327	2	2	2	1	2	2	9714.12	9950.96	2	1
52839	79	5	2	1	3.9	21.26	7.6	0.26	0.29	0.12	41	19.261	10.047	1	1	2	1	2	1	10725.8	11522.3	2	1
58488	77	1	2	1	4.85	33.26	9.7	0.17	1.26	0.31	25	15.627	9.28	2	2	2	1	2	2	55586.5	57945	1	2
53589	75	4	2	1	5	32.58	8.7	0.91	1.28	0.24	19	15.158	8.932	1	1	2	1	2	2	62342.3	61917	1	1
61006	75	3	2	1	5	37.38	8	0.11	1.05	0.4	38	14.578	8.744	1	1	2	1	2	2	55161.2	55848	2	1
10781	75	3	2	1	5	32	6.8	0.11	1.38	0.43	31	15.228	8.955	1	1	2	1	2	2	71913.5	71422.8	2	1
52192	73	4	2	1	1.66	26.44	6	0.37	0.8	0.28	35	10.448	4.774	1	1	2	1	2	2	55672.1	58285.4	2	1
33077	72	3	2	1	1.71	33.45	6.4	0.06	1.28	0.33	26	15.201	8.536	2	1	2	1	2	2	61587.5	61442.9	2	1
18848	69	4	2	1	1.69	27.46	5	0.31	1.42	0.33	23	11.491	6.994	1	2	2	1	2	2	5820.83	6026.96	2	2
46477	68	3	2	1	0.84	24.26	5.7	0.04	0.4	0.12	30	13.206	6.217	2	2	2	1	2	2	6117.21	6561.12	2	2
52109	66	2	2	1	1.21	20.68	12.3	0.11	0.33	0.07	21	16.98	9.519	1	1	2	1	2	2	9716.92	9953.83	2	1
36981	65	1	2	1	4.92	41.66	5.5	0.21	1.67	0.39	23	13.378	6.273	2	2	2	1	2	1	57327.5	61094.7	2	1
42338	64	4	2	1	2.73	29.33	8.8	7.52	0.7	0.09	13	15.392	8.496	1	1	2	1	2	2	49373	51690.6	1	2
38773	64	3	2	1	0.83	29.25	12	0.41	0.97	0.17	18	15.68	8.656	1	1	2	1	2	2	22132.8	22253.3	2	1
53116	63	4	2	1	0.91	36.96	6.2	0.18	1.62	0.45	28	14.998	8.373	2	2	2	1	2	2	10574.4	10948.8	2	1
11756	63	4	2	1	2.68	36.57	7.4	1.03	4.54	0.75	17	13.322	7.216	1	2	2	1	2	2	5913.06	6230.51	2	1
54803	63	3	2	1	1.34	27.53	8.5	0.4	0.5	0.18	36	16.003	7.367	1	2	2	1	2	1	3229.7	3846.98	2	1
47813	63	1	2	1	3.77	30.55	6	0.09	3.2	1.41	44	14.971	8.93	1	1	2	1	2	2	3838.51	3874.96	2	2
54725	62	3	2	1	0.94	29.69	7.1	0.22	0.64	0.2	31	16.871	9.659	1	1	2	1	2	2	4329.1	4283.03	2	1
59405	62	3	2	1	1.74	26.19	5.8	0.06	0.3	0.07	23	13.547	6.95	1	1	2	1	2	2	5765.58	7705.82	2	1
47397	62	3	2	1	2.5	43.83	6.2	0.06	0.32	0.06	19	14.817	8.67	2	1	2	1	2	2	7160.65	7928.06	2	1
52795	61	5	2	1	1.72	26.68	6.2	0.2	0.8	0.15	19	16.874	9.236	1	2	2	1	2	2	3590.33	3624.42	2	1
48253	61	4	2	1	1.81	23.94	8.8	0.84	3.1	0.78	25	24.376	15.099	1	1	2	1	2	2	5913.06	6291.62	1	1
35972	61	3	2	1	2.32	32.59	6.4	0.68	0.8	0.18	23	15.841	9.046	1	1	2	1	2	2	4612.47	6164.66	2	2
55920	60	4	2	1	3.67	25.86	10.5	0.69	0.9	0.27	30	16.109	9.478	2	2	2	1	2	2	42912	47609.7	2	1
14399	60	1	2	1	1.94	34.64	7	0.32	3.64	0.6	16	14.921	8.589	1	1	2	1	2	2	9326.2	9387.79	2	1
49676	59	3	2	1	1.85	34.99	7.6	1.39	1.4	0.2	14	14.593	8.024	1	1	2	1	2	2	13390.2	13314.2	2	1
16110	56	1	2	1	3.71	38.95	11.3	0.39	1.54	0.3	19	14.258	8.976	1	1	2	1	2	2	16724.3	17317.6	1	1
53177	55	4	2	1	1.02	27.14	5.7	4.87	0.95	0.28	29	14.544	7.438	2	1	2	1	2	2	16338.9	20384.3	2	1
11904	51	5	2	1	1.81	25.77	6.4	0.36	1.18	0.42	36	16.803	9.282	2	1	2	1	2	2	7329.06	8318.48	2	2
50108	51	3	2	1	1.01	25.85	7.1	0.47	0.5	0.16	32	16.744	9.191	1	2	2	1	2	2	2245.93	2675.18	2	1
47141	51	2	2	1	0.95	32.6	5.3	0.25	0.77	0.18	23	11.102	5.829	1	1	2	1	2	2	3049.04	3152.62	2	1
43610	51	1	2	1	1.74	27.18	10.6	0.34	0.23	0.12	52	25.868	18.263	1	1	2	1	2	2	4329.1	4476.16	2	1
32079	50	2	2	1	4.99	28.9	7.3	0.08	1.2	0.18	15	16.081	9.872	1	2	2	1	2	2	44600.1	49482.6	2	1
32641	50	1	2	1	2.65	21.57	10.1	0.11	1.02	0.47	46	24.268	15.265	2	2	2	1	2	2	50168.5	52856.9	2	1
53594	49	4	2	1	4.24	33.74	8.8	0.16	2.5	0.71	28	15.575	9.675	2	1	2	1	2	2	8756.93	9562.95	1	2
17821	47	2	2	1	0.85	22.61	7	0.32	0.62	0.19	31	16.689	9.306	1	1	2	1	2	2	6527.94	6424.23	2	1
55324	46	3	2	1	2.5	31.7	6.2	0.96	0.7	0.28	40	13.322	6.772	1	1	2	1	2	2	8531.35	8637.01	2	1
54370	46	1	2	1	1.41	21.86	9.8	0.07	0.69	0.23	33	16.587	9.063	1	1	2	1	2	2	9188.77	9412.8	2	1
19805	44	3	2	1	5	30.82	5.8	0.07	0.96	0.42	44	15.42	9.425	2	1	2	1	2	2	62773.4	63171.5	2	1
61957	43	5	2	1	5	31.37	8.7	0.34	0.34	0.12	35	15.098	9.309	1	1	2	1	2	2	62086.5	60743.5	2	1
15941	42	5	2	1	2.72	32.84	7	0.05	0.6	0.17	28	15.243	8.551	2	1	2	1	2	2	63352.2	62687.1	2	1
42568	42	2	2	1	5	32.2	8.6	0.11	1.07	0.38	36	16.153	12.767	2	1	2	1	2	2	45546	45916.6	2	2
45483	41	4	2	1	3.77	26.61	5.8	0.02	2.4	0.66	28	12.434	6.217	2	1	2	1	2	2	63352.2	62920	2	2
41024	41	4	2	1	0.72	35.19	7.3	0.36	0.65	0.19	29	15.755	9.285	2	1	2	1	2	2	21456.3	21723.4	2	1
58130	40	3	2	1	2.14	30.19	8.7	0.15	2.03	0.4	20	17.835	10.713	2	1	2	1	2	2	7244.33	7491.56	2	1
35818	85	3	1	1	3.17	22.39	7.6	0.42	0.07	0.04	57	16.362	8.952	1	1	2	1	2	2	5442.63	5791.07	1	1
12265	84	3	1	1	5	31.72	5.9	0.4	0.62	0.15	24	14.155	7.938	2	1	2	1	2	2	5442.63	5734.82	2	1
33001	82	3	1	1	2.13	25.66	7.8	0.69	1.8	0.18	10	16.763	9.54	1	1	2	1	2	2	1913.81	1942.39	2	1
50482	80	4	1	1	0.96	26.33	9.9	0.28	0.76	0.18	24	16.583	8.966	2	1	2	1	2	2	6344.36	7332.13	2	1
42329	80	3	1	1	0.76	22.03	6.4	0.15	0.78	0.28	36	11.435	6.717	2	1	2	1	2	2	14371.7	15046.4	2	2
60975	80	3	1	1	3.09	44.92	6.2	0.91	0.44	0.1	23	11.806	6.606	1	2	2	1	2	2	12869.3	13044.6	2	1
53415	80	3	1	1	4.72	31.36	7.4	0.12	1.54	0.37	24	15.31	9.326	1	2	2	1	2	2	5057.98	5123.62	2	1
49151	80	3	1	1	2.51	23.65	7.5	0.58	1.6	0.59	37	15.958	8.961	1	1	2	1	2	2	12001.3	12830.4	2	1
53043	78	3	1	1	4.12	35.21	5.5	0.28	0.4	0.14	35	15.852	9.357	2	1	2	1	2	2	8412.93	8365.16	2	1
36647	75	4	1	1	1.75	32.19	6.6	0.72	1.2	0.35	29	7.327	2.183	1	1	2	1	2	2	43587.6	52191.2	1	2
36118	73	4	1	1	4.46	33.98	7.8	0.14	2.17	0.39	18	14.784	8.604	1	2	2	1	2	2	5651.73	5649.59	1	1
33182	73	3	1	1	3.79	22.6	9.9	0.06	0.37	0.08	22	17.265	10.045	2	1	2	1	2	2	6971.81	7200.12	2	2
18204	72	3	1	1	1.64	32.71	9.3	0.21	2	0.31	16	29.815	19.994	1	2	2	1	2	2	2317.21	2403.78	2	1
35528	71	3	1	1	0.78	29.17	6.6	1.55	0.55	0.18	33	16.347	9.679	1	1	2	1	2	2	5287.57	5231.3	1	2
54456	71	3	1	1	0.62	32.53	8.4	0.32	1.64	0.54	33	15.197	8.295	1	1	2	1	2	2	6434.4	6652.99	2	1
60063	71	3	1	1	0.45	27.69	10.1	0.06	0.87	0.35	40	26.389	16.653	2	1	2	1	2	2	5848.9	6162.9	2	1
17127	71	3	1	1	1.49	23.1	6.8	0.1	0.31	0.15	48	16.8	9.208	1	1	2	1	2	2	5207.73	5152.31	2	1
36354	70	4	1	1	3.45	22.82	8.6	0.11	0.7	0.17	24	16.515	9.617	2	1	2	1	2	2	40992.3	42917.4	2	1
46902	70	3	1	1	5	22	6.6	0.05	0.43	0.11	26	14.926	8.104	2	2	2	1	2	2	8412.93	8365.16	2	1
57100	69	4	1	1	3.03	26.85	8.6	0.8	4.64	0.83	18	12.688	4.996	1	2	2	1	2	1	12008.4	12301.1	1	2
58567	67	3	1	1	0.9	29.9	6.5	0.11	0.3	0.12	40	15.841	7.39	2	1	2	1	2	1	19628.1	23502.4	1	1
58764	67	3	1	1	4.65	30.16	8.6	0.41	0.6	0.06	10	16.553	8.458	2	2	2	1	2	1	51360.3	56982.9	2	1
37066	67	3	1	1	5	38.85	6.8	0.07	0.8	0.45	56	13.158	8.017	2	1	2	1	2	2	47033.1	55567.6	2	1
50698	67	2	1	1	5	29.01	8	0.27	0.95	0.2	21	23.764	15.598	1	1	2	1	2	2	72103.3	73791.5	2	1
45124	66	4	1	1	1.29	31.15	8.1	0.17	0.4	0.13	33	19.442	10.017	1	1	2	1	2	1	42760.5	52185	2	1
12404	65	3	1	1	1.67	27.7	6.3	0.14	1.66	0.44	27	13.933	6.828	1	2	2	1	2	2	3832.35	4135.25	2	2
20583	65	3	1	1	1.93	21.02	14.1	0.1	1.8	0.25	14	16.094	8.927	1	1	2	1	2	2	1913.81	2249.26	2	1
42200	65	3	1	1	1.09	26.19	5.5	0.16	4.21	0.74	18	13.636	6.717	2	1	2	1	2	2	4448.72	4687.56	2	1
57358	65	3	1	1	5	37.38	9	0.76	2.01	0.38	19	15.692	9.744	2	2	2	1	2	2	7101.45	6672.96	1	1
57648	65	3	1	1	0.68	33.94	8.3	0.04	0.34	0.17	50	10.381	4.33	1	1	2	1	2	2	7768.85	7504.78	1	1
54943	65	2	1	1	3.1	23.62	5.9	4.16	0.47	0.15	32	11.99	6.883	1	1	2	1	2	2	8377.22	8651.55	2	1
55019	65	1	1	1	3.21	23.64	12.2	0.06	0.79	0.24	30	23.032	14.322	2	1	2	1	2	2	4329.1	4283.03	2	1
51392	64	2	1	1	4.38	35.16	5.4	0.08	3.68	0.6	16	12.519	7.05	2	1	2	1	2	2	21097.2	21246.8	2	1
43867	63	3	1	1	0.7	22	6.5	0.38	0.33	0.17	52	10.824	7.105	1	1	2	1	2	2	21545.7	21585.1	2	1
54048	63	1	1	1	1.03	29.94	9.2	0.89	1.45	0.41	28	16.404	8.937	1	1	2	1	2	2	23160.6	23031	1	1
60556	62	3	1	1	2.09	30.01	10.2	0.11	0.74	0.12	16	16.416	9.115	2	1	2	1	2	2	11334.5	11376.6	2	1
46704	59	4	1	1	4.87	31.75	6	0.23	0.54	0.16	30	15.374	9.424	1	1	2	1	2	2	95301.6	97668.6	2	1
52723	58	4	1	1	2.99	27.8	6.4	0.02	0.45	0.16	36	16.437	9.411	2	1	2	1	2	2	8616.63	9116.44	2	1
55849	57	3	1	1	0.97	26.41	8.9	0.64	1.02	0.2	20	22.093	10.047	1	1	2	1	2	2	22038.6	24126.1	2	1
19587	57	1	1	1	1.87	31.57	7.3	0.87	0.1	0.06	60	15.546	8.863	1	2	2	1	2	2	25524.8	26584.7	2	1
57608	56	3	1	1	1.72	36.26	6.9	0.08	0.4	0.17	43	10.825	5.717	1	1	2	1	2	2	20496.9	22021.6	2	1
19945	56	2	1	1	2.06	32.32	7.7	0.21	0.91	0.27	30	12.878	7.549	2	1	2	1	2	2	23122.2	22997.3	2	1
59399	55	4	1	1	4.68	39.72	5.7	0.55	0.68	0.27	40	12.323	6.328	2	1	2	1	2	2	105889	104617	2	1
33694	54	3	1	1	5	27.27	6	0.16	1.3	0.18	14	15.578	9.502	1	1	2	1	2	2	73172	76539.7	2	1
18533	54	3	1	1	1.96	28.73	7.6	0.05	1.51	0.5	33	17.114	10.158	1	1	2	1	2	2	10271.1	10866.9	1	1
44123	54	3	1	1	1.13	31.12	9.1	0.11	0.53	0.1	19	14.926	7.94	1	1	2	1	2	2	12839.6	13063.9	1	1
48133	52	3	1	1	2.56	18.36	6.4	0.05	0.65	0.36	55	16.529	9.364	1	2	2	1	2	2	63454	65198.4	2	1
35874	51	3	1	1	2.75	23.72	9.9	0.44	2.61	0.33	13	19.591	11.935	2	1	2	1	2	2	17672.9	17577.4	2	1
47254	51	3	1	1	3.21	36.26	8.4	0.53	0.28	0.06	21	16.908	10.491	1	1	2	1	2	2	86111.8	88479.1	2	1
34220	50	4	1	1	1.16	43.02	6.5	2.05	0.24	0.06	25	14.421	8.261	1	2	2	1	2	2	14567.2	15021.5	2	1
43151	50	4	1	1	4.12	25.08	5.4	0.05	0.77	0.19	25	13.378	6.828	1	1	2	1	2	2	14464.5	15143.5	2	2
56831	50	2	1	1	1.73	24.31	12.8	0.31	0.6	0.27	45	28.676	18.844	1	1	2	1	2	2	12387.6	12506.5	2	2
41961	46	3	1	1	0.54	36.22	6.1	0.16	0.34	0.12	35	14.325	7.549	1	1	2	1	2	2	9776.55	9812.82	2	2
10705	46	3	1	1	5	26.03	4.5	0.05	0.43	0.18	42	12.368	6.328	1	1	2	1	2	2	99572.4	99945.4	2	2
53762	44	1	1	1	5	22.92	5	0.05	6.19	1.39	22	13.655	8.771	2	1	2	1	2	2	17672.9	17597.1	2	1
14438	81	3	1	1	3.33	28.45	5.8	0.07	2.29	0.74	32	15.471	9.047	1	1	2	1	2	2	22079.3	22289.6	2	2
43705	80	4	1	1	1.91	34.92	8	0.1	0.54	0.05	9	15.55	8.826	2	1	2	1	2	2	11334.5	11532.5	1	1
51635	80	3	1	1	2.49	29.58	9.6	0.05	0.38	0.08	21	16.543	9.263	2	1	2	1	2	2	12244.5	12405.3	1	1
56456	80	3	1	1	3.61	28.86	9.3	0.14	0.5	0.23	46	15.774	9.6	1	1	2	1	2	2	24994.2	26853.5	1	1
46629	80	3	1	1	5	25.56	5.7	0.53	13	1.31	10	11.713	5.884	2	1	2	1	2	2	82326.8	82477.4	2	1
31603	79	3	1	1	2.42	39.18	6.1	0.22	0.55	0.16	29	12.379	7.494	2	1	2	1	2	2	89650.9	91877.5	2	2
38897	78	3	1	1	0.72	20.09	6.6	0.14	0.13	0.04	31	10.51	4.441	1	2	2	1	2	2	34162.8	34225.3	1	1
46491	78	3	1	1	5	42.84	5.7	0.51	3.8	0.88	23	15.054	9.488	2	2	2	1	2	2	50460	54202.6	2	1
60558	78	3	1	1	2.88	30.45	6.2	0.23	1.1	0.37	34	15.992	9.827	2	1	2	1	2	2	61233.7	61242.8	2	1
57528	77	4	1	1	5	23.13	6.3	0.15	1.4	0.36	26	17.829	11.022	2	1	2	1	2	2	73172	73182.9	1	1
37901	77	3	1	1	2.56	25.95	9.5	0.21	0.56	0.13	23	16.918	9.528	2	1	2	1	2	2	16143	17724.4	2	1
39470	76	4	1	1	1.39	23.31	5.1	0.04	0.54	0.23	43	12.153	5.94	1	1	2	1	2	2	72477.4	74245.8	2	1
52243	76	3	1	1	5	30.96	6	0.06	0.5	0.23	46	16.442	10.045	2	2	2	1	2	2	26005.4	26066.1	2	1
53102	75	3	1	1	2.71	52.94	9.6	4.04	0.16	0.04	25	17.652	11.102	2	1	2	1	2	2	25858.4	26932.1	2	2
15649	74	3	1	1	2.09	49.8	9.8	0.59	0.52	0.14	27	14.432	8.905	1	2	2	1	2	2	32380.3	32455.9	1	1
38861	73	3	1	1	5	21.55	5.6	0.01	1.56	0.32	21	16.717	9.522	2	1	2	1	2	2	101310	101690	1	2
48887	72	4	1	1	2.59	27.37	5.4	0.04	0.66	0.24	36	15.543	4.829	1	1	2	1	2	2	77911.3	79453.1	2	2
35434	71	4	1	1	5	30.15	6.5	0.33	7.33	1.77	24	15.703	9.437	1	1	2	1	2	2	111307	113663	2	1
40563	70	4	1	1	4.5	25.65	6.6	0.16	1.54	0.31	20	15.639	9.104	1	2	2	1	2	2	25841.6	28409.4	2	1
50975	70	1	1	1	1.29	33.97	6.5	0.57	0.29	0.13	45	13.892	7.383	1	1	2	1	2	2	25211.3	27716.5	2	1
43533	69	4	1	1	1.18	28.37	12	0.13	0.58	0.18	31	26.249	16.931	1	1	2	1	2	2	9970.34	9994.98	2	2
61144	69	2	1	1	0.7	29.2	7.7	0.39	0.9	0.11	12	13.149	7.05	1	1	2	1	2	2	27487	27491.1	2	1
15655	68	4	1	1	1.09	27.46	7.3	0.02	1.2	0.17	14	19.846	11.789	1	1	2	1	2	2	27487	27962.5	1	1
47979	68	3	1	1	1.69	33.19	8.2	0.32	2.2	0.41	19	16.497	9.831	2	1	2	1	2	2	23002.4	23005.8	1	2
13712	68	3	1	1	1.44	23.54	6.1	0.03	0.3	0.11	37	13.489	6.883	2	2	2	1	2	2	10920.1	11711.2	2	1
51302	68	3	1	1	3.43	35.36	7.3	0.28	0.43	0.2	47	15.389	8.905	2	1	2	1	2	2	19113.1	19184	2	1
35407	67	4	1	1	2.31	26.91	6.9	0.11	0.34	0.07	21	17.136	9.878	2	2	2	1	2	2	14816.8	15512.3	2	1
16157	67	3	1	1	1.42	22.63	11.1	0.22	2.29	0.79	34	17.099	9.296	2	1	2	1	2	2	14309.2	14755.5	2	1
50864	66	1	1	1	5	26.49	7	0.03	0.71	0.21	30	30.18	20.983	2	2	2	1	2	2	107491	109448	1	2
38679	65	3	1	1	2.69	33.04	8.5	0.26	4.1	0.29	7	15.118	9.091	1	1	2	1	2	2	56818.5	59433.6	1	1
37455	64	1	1	1	0.69	39.28	6.6	0.47	0.89	0.38	43	14.491	7.915	1	1	2	1	2	2	24437	24300.3	2	1
41138	62	4	1	1	1.25	24.59	9.9	0.86	0.4	0.16	40	16.585	9.181	2	2	2	1	2	2	12839.6	12887.3	2	1
46933	62	4	1	1	1.97	25.77	13.3	0.19	0.47	0.11	23	24.043	15.765	1	1	2	1	2	2	10385.5	10689.5	2	1
51144	62	4	1	1	1.89	28.6	8.1	0.07	1	0.21	21	16.482	9.173	2	1	2	1	2	2	17560.2	19280.4	2	1
36686	62	4	1	1	2.54	26.53	7.1	0.03	0.32	0.11	34	16.769	9.301	1	1	2	1	2	2	10271.1	10866.9	1	1
60269	62	3	1	1	5	38.61	5.6	1.45	0.8	0.2	25	15.624	9.675	1	1	2	1	2	2	16143	17312.5	2	2
46570	61	4	1	1	0	47.16	7	0.6	0.3	0.16	53	13.041	7.321	1	2	2	1	2	2	56818.5	58729.3	2	1
52162	61	4	1	1	5	33.65	6.4	0.12	0.2	0.08	40	11.72	6.495	2	1	2	1	2	2	18685.6	18650.5	2	1
50787	60	4	1	1	3.4	33.38	7.2	0.22	0.73	0.36	49	14.907	8.841	1	1	2	1	2	2	20697.8	21367.3	2	1
12697	59	4	1	1	0.92	25.53	8.2	0.01	0.35	0.14	40	22.482	10.991	1	1	2	1	2	1	17158.9	17126.7	2	1
32891	59	4	1	1	1.92	39.97	6	0.27	2.86	0.41	14	14.855	8.857	1	1	2	1	2	2	23747.3	23615.7	2	2
35608	58	4	1	1	3.12	27.69	11.7	0.77	0.5	0.12	24	28.531	19.489	1	1	2	1	2	2	56818.5	59613.8	2	1
55555	58	4	1	1	1.42	30.7	6.6	0.8	2.03	0.39	19	14.599	8.049	1	1	2	1	2	1	24155.2	25217.7	2	1
51023	57	5	1	1	4.36	29.32	6.1	0.33	0.1	0.04	40	16.417	8.278	1	1	2	1	2	1	75532.6	75543.9	2	1
45477	56	2	1	1	3.98	26.94	8.6	0.06	0.45	0.21	47	22.76	14.433	1	1	2	1	2	2	72987.5	75696.6	1	2
55789	56	2	1	1	3.41	30.41	7.7	0.19	0.94	0.36	38	16.561	9.706	2	2	2	1	2	2	83470.2	85543.3	2	1
15617	55	2	1	1	3.11	22.28	11.8	0.04	0.2	0.07	35	16.771	9.633	2	2	2	1	2	2	9970.34	10324.2	1	1
42850	53	3	1	1	1.45	25.78	10.2	0.19	0.74	0.19	26	15.947	8.475	1	1	2	1	2	2	10114.5	10461.8	2	1
20118	53	2	1	1	0.42	26.36	8.9	0.18	0.3	0.06	20	16.185	8.66	1	1	2	1	2	2	9254.01	9446.34	2	2
47318	53	1	1	1	0.98	32.97	7.5	0.39	0.85	0.3	35	18.903	11.158	1	1	2	1	2	2	70355.1	71843.8	2	1
18439	52	3	1	1	5	25.86	7.3	0.41	1.05	0.47	45	16.352	9.931	2	2	2	1	2	2	26005.4	26846.5	1	2
47603	52	1	1	1	2.57	29.17	7.7	0.26	1.11	0.45	41	15.265	8.715	2	1	2	1	2	2	32380.3	32455.9	2	2
56028	52	1	1	1	5	26.73	6.4	0.12	0.77	0.27	35	17.98	9.659	1	1	2	1	2	1	22436.1	24207	1	2
39422	51	3	1	1	4.72	31.97	9.3	0.21	0.53	0.16	30	22.128	14.377	2	1	2	1	2	2	20000.3	19889.4	2	1
14097	50	4	1	1	3.63	33.43	6.1	0.18	0.47	0.14	30	13.711	7.161	2	1	2	1	2	2	101310	102125	2	1
48248	50	2	1	1	1.53	29.91	6.4	0.39	0.95	0.16	17	15.274	8.843	1	1	2	1	2	2	38574.8	39532.9	2	1
45858	49	4	1	1	5	28.76	6.7	0.1	0.2	0.05	25	19.2	10.55	1	1	2	1	2	1	91664.3	93090.2	2	1
59945	48	5	1	1	1.94	33.3	8	0.06	1.05	0.42	40	17.407	10.158	1	1	2	1	2	2	12276.1	12437.3	1	1
37488	48	3	1	1	1.47	23.87	6.9	0.09	0.57	0.13	23	14.488	9.492	2	1	2	1	2	2	9970.34	9994.98	2	1
54540	47	2	1	1	5	38.46	6.8	0.32	2.07	0.27	13	14.433	8.16	1	1	2	1	2	2	9419.04	9712.84	2	1
46436	46	4	1	1	5	36.39	4.6	0.18	0.35	0.15	43	10.182	5.94	1	1	2	1	2	2	24368.2	25338.3	2	1
56866	46	1	1	1	2.3	26.52	6.9	0.19	0.34	0.11	32	15.518	8.795	1	1	2	1	2	2	15213.9	15695.8	2	1
10635	45	4	1	1	1.22	24.74	8.4	0.17	1.26	0.21	17	22.148	9.048	1	1	2	1	2	1	12120.5	12536.8	2	1
46597	45	2	1	1	1.13	26.73	13.1	0.38	0.07	0.04	57	27.879	18.54	1	2	2	1	2	2	11634.6	13942.4	2	1
53211	45	1	1	1	2.31	26.92	11.7	0.16	0.52	0.14	27	24.813	15.765	2	1	2	1	2	2	10920.1	11989.8	2	2
58396	44	4	1	1	1.41	25.76	8.7	0.1	0.2	0.08	40	14.969	7.771	2	2	2	1	2	2	13495.3	14278.1	2	1
12147	44	1	1	1	1.7	31.63	7.2	0.07	1.1	0.29	26	15.039	8.061	1	1	2	1	2	2	9957.68	9992.82	2	1
49828	43	4	1	1	0.36	24.34	5.8	0.18	0.46	0.12	26	12.157	6.384	1	1	2	1	2	2	10383.4	10676.7	2	1
46385	42	3	1	1	2.27	21.3	7.6	0.05	0.6	0.18	30	14.671	7.989	1	1	2	1	2	2	81886.9	83907.4	2	1
55698	80	4	1	1	0.75	29.9	6.2	0.42	1.01	0.32	32	11.153	5.051	1	1	2	1	2	2	25858.4	26932.1	1	1
47795	80	3	1	1	1.62	42.89	9.2	0.31	0.27	0.08	30	14.092	8.317	2	1	2	1	2	2	26641.9	28044.5	2	1
48065	79	3	1	1	3.61	22.93	7.8	0.29	0.33	0.08	24	16.519	9.585	1	1	2	1	2	2	88700.2	90762.4	1	2
61053	78	4	1	1	2.17	27.8	6.2	0.1	0.67	0.16	24	14.488	7.438	1	1	2	1	2	2	23372.2	23780.5	2	1
48320	78	2	1	1	1.63	24.77	10.6	0.2	0.72	0.17	24	23.254	14.433	1	2	2	1	2	2	20256.9	20399.4	1	2
50526	78	1	1	1	2.08	35.85	6.6	0.16	2.18	0.43	20	12.212	6.661	1	1	2	1	2	2	20020.6	20283.6	2	1
58593	77	2	1	1	0.51	23.7	8.9	5.38	2.02	0.17	8	16.552	8.847	1	1	2	1	2	2	19361.7	19974.9	1	2
34594	76	4	1	1	5	21.14	6.3	0.04	0.95	0.29	31	15.39	8.771	1	1	2	1	2	2	91233.3	94447.6	1	2
49001	76	1	1	1	0.94	37.3	6.8	0.13	1.7	0.32	19	13.277	7.144	2	2	2	1	2	2	112358	116137	2	1
31454	75	2	1	1	1.25	33.48	8.5	0.07	0.2	0.04	20	14.857	8.288	1	1	2	1	2	2	47013.9	47229.6	1	1
10597	75	1	1	1	2.17	27.29	8.8	0.65	1.89	0.31	16	31.03	19.04	1	1	2	1	2	1	22971.2	23620	2	1
46359	74	3	1	1	1.18	22.09	12.5	0.03	0.8	0.08	10	16.776	9.064	2	1	2	1	2	2	10469.7	10718.9	2	2
20933	74	1	1	1	2.25	30.78	7.3	0.05	0.78	0.28	36	16.89	9.659	2	1	2	1	2	2	23503.3	23668.7	2	1
53942	73	3	1	1	1.97	34.21	10.2	0.33	0.2	0.09	45	20.039	11.768	2	1	2	1	2	2	28690.4	30955	2	1
32062	73	1	1	1	5	31.49	7.6	0.05	0.52	0.14	27	22.643	14.821	2	1	2	1	2	2	91233.3	90558.1	1	2
49843	73	1	1	1	4.08	34.33	7.6	0.32	0.56	0.19	34	13.989	6.994	2	2	2	1	2	1	95086.5	96466	2	1
14129	72	4	1	1	4.91	28.05	6.6	0.18	0.77	0.17	22	16.494	8.371	2	1	2	1	2	1	115169	119480	2	1
51623	72	3	1	1	3.88	22.33	12	0.01	0.6	0.1	17	16.586	9.997	1	1	2	1	2	2	95849.4	95863.7	2	2
39752	72	1	1	1	3.17	30.36	6.6	0.06	0.63	0.15	24	15.627	8.796	2	1	2	1	2	2	18314.7	18943.6	1	1
52576	72	1	1	1	2.27	29.92	11.8	0.94	1.1	0.33	30	27.235	17.874	2	1	2	1	2	2	24613.9	25381.7	1	2
52422	70	1	1	1	5	39.26	6.6	0.82	0.25	0.1	40	12.154	7.161	2	1	2	1	2	2	104644	107077	2	1
44195	69	2	1	1	4.72	30.45	7.7	0.1	0.36	0.12	33	16.098	9.699	2	1	2	1	2	2	115339	117384	1	1
60135	69	1	1	1	5	29.64	10.5	0.1	0.3	0.19	63	16.754	8.59	1	1	2	1	2	1	90610.4	90623.9	2	1
19498	68	3	1	1	2.83	25.15	14	0.42	0.4	0.07	18	23.639	15.533	1	2	2	1	2	2	9322.05	9819.73	2	1
60946	68	2	1	1	1.03	38.71	6.7	0.22	0.43	0.05	12	7.327	8.937	1	1	2	1	2	2	20746.6	21720.5	2	1
36950	67	4	1	1	0.93	31.97	7.8	0.17	1.12	0.27	24	21.694	13.267	2	1	2	1	2	2	31134.5	32203.7	2	2
31945	67	3	1	1	3.4	24.67	5.9	0.31	1.3	0.22	17	13.482	7.161	1	1	2	1	2	2	12570.1	12690.7	2	2
43684	67	1	1	1	0.54	24.54	6.4	0.2	1	0.49	49	16.459	8.818	1	1	2	1	2	2	11336.8	11376.8	2	1
40523	67	1	1	1	1.33	29.69	6	0.15	1.5	0.26	17	16.001	8.845	1	1	2	1	2	2	10702.1	11273.4	2	1
33726	66	1	1	1	1.94	22.3	12.9	0.12	0.5	0.14	28	17.262	9.52	1	2	2	1	2	2	20363.3	20357.2	1	2
41991	66	1	1	1	1.45	39.99	6.3	0.14	0.61	0.28	46	16.264	7.938	2	1	2	1	2	2	76612.8	76598.2	2	1
47331	65	2	1	1	2.35	35.53	5	0.16	0.91	0.37	41	11.768	5.662	2	1	2	1	2	2	16110.4	16150.2	2	1
34086	64	3	1	1	2.42	34.76	8.3	0.33	0.55	0.11	20	13.158	7.05	2	1	2	1	2	2	21392	22151.3	2	1
11403	64	1	1	1	2.48	31.39	8.7	0.13	0.9	0.22	24	16.312	9.724	1	2	2	1	2	2	13063.4	13760.8	2	1
15923	64	1	1	1	1.05	34.34	7.6	0.11	0.64	0.13	20	15.382	8.384	2	1	2	1	2	2	28540	29520	2	1
58603	64	1	1	1	1.99	27.38	7.4	0.23	0.88	0.32	36	18.582	11.491	1	1	2	1	2	2	28374.3	30429.9	2	1
10102	63	4	1	1	1.5	27.76	7.4	0.17	0.9	0.31	34	16.171	8.907	2	1	2	1	2	2	20476.9	20700.3	2	2
51430	63	3	1	1	3.13	26.52	5.4	0.19	1.6	0.28	18	12.703	7.228	2	1	2	1	2	2	92962.9	99858	2	2
43351	63	1	1	1	0.93	37.63	7.1	0.36	0.4	0.23	58	16.385	9.933	1	1	2	1	2	2	93784.7	95243.7	2	1
18709	62	4	1	1	0.46	35.91	6.1	0.68	0.55	0.18	33	15.115	8.258	1	1	2	1	2	2	33324.7	34571.9	2	2
39086	62	4	1	1	2.37	39.66	7.9	0.28	1.06	0.24	23	16.82	8.826	2	1	2	1	2	1	12583.4	12630.1	2	2
61550	62	3	1	1	4.97	18.13	4.8	0.06	0.77	0.35	45	12.878	4.718	2	1	2	1	2	1	22079.3	22778.6	2	1
56565	62	2	1	1	3.99	42.61	7.3	1.94	0.3	0.09	30	12.8	8.111	1	1	2	1	2	2	10702.1	10804.7	2	1
56652	62	1	1	1	1.49	26.15	12.9	0.06	0.58	0.24	41	16.1	8.889	1	1	2	1	2	2	20256.9	21102	2	1
14111	62	1	1	1	1.8	28.94	8.9	0.39	0.91	0.27	30	16.173	9.039	1	1	2	1	2	2	22079.3	23899.4	2	2
14069	61	3	1	1	3.46	33.61	10.2	0.06	0.3	0.15	50	14.26	7.938	2	1	2	1	2	2	62218.9	61758.4	1	1
20889	61	3	1	1	1.27	24.71	10.3	0.1	0.6	0.22	37	24.202	11.657	2	1	2	1	2	1	20289	21040.3	2	2
56163	61	1	1	1	4.84	37.29	9.4	0.21	0.2	0.11	55	15.407	9.506	1	1	2	1	2	2	24136.5	23773.2	2	1
61775	61	1	1	1	3.8	26.31	5.8	0.05	0.98	0.38	39	13.411	6.939	2	1	2	1	2	2	91233.3	91799.4	2	1
37129	61	1	1	1	5	34.42	4.9	1.94	0.54	0.29	54	14.742	9.167	1	1	2	1	2	2	101273	104792	2	1
35884	60	3	1	1	2.15	24.91	5.6	0.08	1.2	0.21	18	11.181	5.311	1	2	2	1	2	2	47013.9	50501	2	2
59133	60	1	1	1	1.55	25.26	5.8	0.69	0.65	0.22	34	12.101	6.217	1	1	2	1	2	2	20236	21301.4	2	1
52384	59	1	1	1	2.99	29.59	6.7	0.56	0.86	0.09	10	16.89	9.936	2	1	2	1	2	2	16781.3	17276.4	2	1
61821	57	4	1	1	0.67	25.52	10.2	0.08	1.6	0.26	16	16.548	8.733	1	1	2	1	2	2	19683.9	20039.7	2	2
44249	57	2	1	1	2.73	26.19	6.5	0.31	0.5	0.19	38	13.296	7.133	1	1	2	1	2	2	83210.6	84505.1	2	1
44223	57	1	1	1	5	29.99	9.3	0.8	0.9	0.24	27	15.546	9.091	1	1	2	1	2	2	20697.8	21367.3	1	2
50813	56	3	1	1	5	41.18	5.5	0.35	0.3	0.1	33	9.834	5.639	1	1	2	1	2	2	81886.9	87960.4	2	1
46187	56	2	1	1	2.68	33.3	11.4	0.34	0.6	0.17	28	26.1	17.722	1	1	2	1	2	2	35689.9	38337	2	1
57028	55	1	1	1	4.18	18.59	11.3	0.72	1.41	0.54	38	22.365	14.488	1	1	2	1	2	2	24368.2	25338.3	1	2
59780	54	4	1	1	4.38	21.44	5.7	0.06	0.61	0.25	41	17.176	10.092	1	1	2	1	2	2	15222.7	16748.2	2	1
39556	54	4	1	1	1.72	20.33	5.2	1.36	0.9	0.36	40	12.656	4.607	1	1	2	1	2	1	16818.4	17607.8	2	1
40637	53	3	1	1	4.8	26.06	8.1	0.09	0.58	0.13	22	15.683	9.49	1	1	2	1	2	2	19404	20031.5	2	1
49009	52	1	1	1	3.34	32.16	6.5	0.26	0.75	0.26	35	13.627	7.327	2	1	2	1	2	2	24136.5	23773.2	2	1
59110	51	1	1	1	2.87	31.52	7	0.35	0.91	0.46	51	15.39	9.029	1	2	2	1	2	2	32380.3	33724.8	2	2
42422	51	1	1	1	3.92	27.11	5.6	0.29	1.2	0.37	31	15.641	9.219	2	1	2	1	2	2	70778	76027.6	2	2
14799	51	1	1	1	5	33.91	5.7	0.2	0.64	0.14	22	11.213	6.495	1	1	2	1	2	2	101959	105554	2	1
43445	50	1	1	1	4.75	32.93	6.7	0.17	0.43	0.29	67	13.381	8.271	2	1	2	1	2	2	90414.5	90397.3	2	1
46269	50	1	1	1	5	29.3	9.3	0.08	0.4	0.13	33	20.487	13.328	1	1	2	1	2	2	92962.9	95602.7	2	1
14389	50	1	1	1	0.78	23.86	8.7	0.12	0.79	0.17	22	16.053	8.33	1	1	2	1	2	2	19579.6	19858.1	1	2
57541	50	1	1	1	0.74	31.05	9.4	0.41	0.42	0.18	43	24.236	15.543	1	1	2	1	2	2	30901.6	32195.8	1	1
61253	49	1	1	1	1.27	28.8	8.9	0.11	0.5	0.12	24	15.408	8.514	1	1	2	1	2	2	14951.1	15807.9	2	2
11121	46	1	1	1	1.99	29.76	8.1	0.5	0.5	0.14	28	16.352	9.828	1	1	2	1	2	2	20922	20854.2	1	2
16312	46	1	1	1	4.54	39.16	7.4	1.52	0.56	0.25	45	14.505	8.679	2	1	2	1	2	2	82398.1	83593.4	1	2
40697	44	1	1	1	5	29.57	10	0.34	0.29	0.12	41	16.845	10.872	2	2	2	1	2	2	72840.6	75566.7	1	1
58972	42	1	1	1	0.71	31.92	6	0.08	0.8	0.24	30	14.45	7.794	1	2	2	1	2	2	64653.5	66827.8	2	2
12748	42	1	1	1	0.41	24.29	8.6	0.12	0.48	0.22	46	14.025	6.772	2	2	2	1	2	2	38584	38489.2	2	1
31899	40	3	1	1	4.25	39.51	7.3	0.42	0.82	0.19	23	15.265	7.938	1	1	2	1	2	2	23121.2	23842.4	2	2
12118	51	3	2	1	0.8	28.54	5.5	0.15	1.8	0.63	35	10.469	4.439	2	2	2	1	1	2	9490.96	10127.4	2	1
47380	57	1	1	1	1.05	28.49	6.4	0.3	10.8	1.62	15	15.95	7.332	1	2	2	1	1	1	11003.3	13175.2	2	1
20919	70	3	1	1	5	29.63	5.9	0.08	1.46	0.61	42	11.384	6.217	2	1	2	1	1	2	21792.4	22475.1	2	1
43063	66	2	1	1	5	26.71	7.1	0.22	10	1.25	13	16.023	8.094	1	1	2	1	1	1	12609.1	13300	2	1
51576	51	1	1	1	1.4	20.85	7.4	0.54	1.5	0.4	27	16.65	7.61	1	1	2	1	1	1	10484.8	12795.7	2	2
35515	58	4	2	2	3.39	33.6	6.2	0.09	2.8	0.72	26	15.375	7.454	1	1	2	1	1	1	12814.2	12899	2	1
46348	58	4	1	2	5	25.96	8.8	0.06	0.49	0.22	45	18.52	11.435	2	2	2	1	1	2	19376.6	20098.8	2	1
47224	53	3	1	2	2.47	27.21	8.1	0.04	0.86	0.39	45	15.73	8.429	1	1	2	1	1	2	18550	20749.5	1	2
46548	80	4	1	2	1.69	27.62	6.8	0.05	7.12	3.16	44	16.337	8.906	1	2	2	1	1	2	21806.9	22502.5	2	1
47014	61	4	2	2	3.36	26.06	8.9	0.06	0.29	0.11	38	18.847	9.437	2	1	2	1	1	1	31524.1	30950.5	1	2
39872	64	3	1	2	1.2	27.88	6.5	0.24	2.65	0.69	26	15.711	8.717	1	1	2	1	1	2	8859.28	8924.15	2	1
58269	60	2	1	2	3.92	30.43	5.3	0.13	0.94	0.54	57	11.879	5.995	1	1	2	1	1	2	34961.9	35002.3	2	1
32444	85	3	1	2	4.77	24	6.3	0.06	1.6	0.41	26	11.588	6.1	1	2	2	1	1	2	3975.29	4219.68	2	1
36843	81	3	1	2	2.49	29.28	8.7	0.2	2.61	1.46	56	17.453	10.547	1	1	2	1	1	2	15294.1	16199.9	1	2
31736	79	4	1	2	1.46	29.75	6.9	0.06	2.76	0.4	14	14.708	8.131	1	1	2	1	1	2	8384.65	8644.92	2	1
42154	75	3	1	2	1.11	29.61	8.2	1.08	1.31	0.35	27	12.735	6.051	1	1	2	1	1	2	10077.3	10598.6	1	2
35652	65	1	1	2	1.51	41.2	6	0.7	0.21	0.11	52	14.124	7.769	2	2	2	1	1	2	35604.4	36212.5	1	2
56956	59	3	1	2	5	40.7	7.2	0.42	2.85	0.39	14	14.757	9.174	1	1	2	1	1	2	28153.1	29102.4	2	1
61625	73	3	3	2	2.18	29.97	6.1	0.05	0.23	0.11	48	13.41	7.272	1	1	2	1	1	2	37131.1	39668.5	2	2
31132	70	3	3	2	0.95	32.27	5.4	0.86	1.28	0.4	31	13.156	6.717	1	1	2	1	1	2	24693	27499.3	2	1
32926	70	3	3	2	0.91	22.59	8.3	0.18	2.74	0.66	24	16.827	9.083	1	2	2	1	1	2	16238.7	18030.6	2	1
17578	64	1	3	2	1.68	27.74	6.1	1.02	1.73	1.01	58	14.502	7.272	1	1	2	1	1	2	11230.8	11790.6	2	1
51204	55	4	3	2	4.29	32.74	8.3	0.34	0.23	0.13	57	24.333	16.431	2	2	2	1	1	2	45016.8	46777.5	1	1
34975	63	3	3	1	1.89	36.84	7.9	1.12	0.8	0.28	35	17.234	8.567	1	1	2	1	1	1	33863.8	35719.2	2	1
54207	62	2	3	1	2.13	32.62	6.7	0.34	0.44	0.19	43	13.698	7.105	2	2	2	1	1	2	7492.22	7549.68	1	2
52632	61	2	3	1	1.67	30.52	9.6	0.17	1.04	0.31	30	15.256	8.432	2	1	2	1	1	2	9588.81	9822.59	1	1
11148	52	3	3	1	3.09	26.18	7.6	0.03	1.74	0.34	20	13.979	7.05	1	1	2	1	1	2	8377.22	8651.55	2	1
38120	42	1	3	1	3.15	29.39	7.1	0.14	1.85	0.74	40	14.452	8.16	1	1	2	1	1	2	46864.7	47353.4	1	2
52679	80	4	2	1	0.59	28.93	5.4	0.64	4.73	1.76	37	15.954	8.862	1	1	2	1	1	2	7297.43	8079.51	1	2
17725	72	1	2	1	1.72	24.37	6.9	0.05	0.07	0.04	57	15.973	8.327	1	1	2	1	1	2	52159.3	54607.8	2	1
33972	65	4	2	1	4.64	29.1	6	0.44	2.84	0.4	14	16.109	9.879	2	1	2	1	1	2	60764.1	60349.5	2	1
35891	63	4	2	1	1.8	29.98	7.1	0.07	3.1	1.21	39	13.07	5.161	2	2	2	1	1	1	5953.44	6996.95	2	1
53154	55	3	2	1	4.46	37.68	5.7	0.22	1.04	0.26	25	15.289	9.152	1	1	2	1	1	2	53058.4	53719	2	1
52864	55	3	2	1	1.07	30.66	8.5	0.09	1.13	0.21	19	14.004	7.161	2	1	2	1	1	2	19360.6	18941.8	1	1
55768	48	2	2	1	0	35.58	6.5	0.87	0.74	0.23	31	15.321	7.771	1	1	2	1	1	2	7289.41	7830.69	2	1
42404	79	3	1	1	2.18	29.68	8.7	0.92	2.29	1.56	68	16.945	10.436	1	2	2	1	1	2	10948	11214.9	1	2
10962	66	4	1	1	3.31	43.58	5.5	0.65	0.89	0.16	18	10.758	5.829	2	1	2	1	1	2	62773.4	62023.4	2	2
41680	63	4	1	1	5	31.52	8	0.11	2.53	0.41	16	15.058	9.165	2	1	2	1	1	2	80151.8	82142.5	1	1
32008	62	5	1	1	3.62	26.89	6.6	0.11	1.87	0.34	18	12.459	6.772	1	1	2	1	1	2	10385.5	10689.5	1	1
59908	71	4	1	1	1.09	40.65	6.9	0.39	0.6	0.15	25	14.31	7.937	2	1	2	1	1	2	63875.1	65689	2	1
37968	56	5	3	1	2.91	24.99	5.7	4.32	2.2	1.16	53	13.073	7.183	1	1	1	1	2	2	11823	13968.3	2	2
20052	42	3	3	1	4.07	32.55	6.7	0.18	2.2	0.54	25	15.732	9.528	2	1	1	1	2	2	11003.3	11741.2	1	2
56824	66	4	2	1	1.28	30.51	6.1	1.75	9.04	1.31	14	15.21	7.549	1	2	1	1	2	2	20926	21315.1	2	1
45006	49	4	2	1	1.95	27.78	6.2	0.07	1.02	0.37	36	14.026	7.494	1	1	1	1	2	2	25637.7	29190.6	2	1
55862	47	1	2	1	0.84	30.94	6.5	0.89	3.82	0.66	17	17.087	8.049	1	2	1	1	2	1	11731.2	12281	2	1
12745	75	3	1	1	1.51	31.93	6.7	0.34	2.8	1.1	39	11.685	5.644	1	1	1	1	2	2	12948.1	15297.6	2	1
49595	46	3	1	1	3.61	21.93	7.1	0.09	2.6	0.74	28	16.517	9.272	2	2	1	1	2	2	9730.89	9928.15	2	1
51183	41	2	1	1	0.51	27.35	12	0.65	0.3	0.07	23	31.03	24.517	1	1	1	1	2	2	1960.48	2148.56	2	1
39493	82	3	1	1	1.12	25.19	6.9	0.2	0.92	0.42	46	13.322	4.885	1	1	1	1	2	1	11383	11721.2	1	2
56869	80	3	1	1	1.98	30.17	6.1	1.53	2.6	0.43	17	15.188	8.573	1	1	1	1	2	2	11003.3	13428.5	2	1
46531	69	4	1	1	1.14	24.06	6.2	2.27	3.74	0.49	13	17.08	9.669	1	2	1	1	2	2	21788.8	22194	2	2
13833	81	1	1	1	0.77	19.84	5.5	0.55	12.4	1.29	10	11.499	5.3	1	1	1	1	2	2	8018.39	8457.72	2	2
50043	76	3	1	1	0.98	29.24	6.3	0.42	4.42	1.16	26	13.969	7.383	1	2	1	1	2	2	6649.13	6931	2	1
39932	63	1	1	1	1.94	21.18	7.2	0.01	2.96	1.49	50	11.122	4.885	2	2	1	1	2	2	9926.6	10347.4	2	1
56837	76	3	3	2	0.68	29.04	6.6	0.07	1.2	0.36	30	18.489	9.128	2	1	1	1	2	1	8018.39	9601.11	2	1
49546	60	3	3	2	1.33	35.86	7.7	0.43	2.54	0.97	38	18.386	11.38	2	1	1	1	2	2	11035.7	12565	1	2
48731	72	3	2	2	1.3	21.91	5.8	0.19	1.29	0.24	19	15.912	8.207	2	1	1	1	2	2	10324.4	11093.4	2	1
48427	63	3	2	2	1.92	24.27	6.7	0.38	10.61	1.63	15	16.385	8.028	1	1	1	1	2	1	8434.92	8490.76	2	2
17268	61	1	2	2	2.17	31.05	7.6	0.03	0.53	0.27	51	15.176	8.445	1	1	1	1	2	2	9938.61	11112.9	1	1
46969	45	5	2	2	3.92	29.36	6.8	0.01	7.15	2.79	39	13.749	7.993	2	1	1	1	2	2	20784.2	21012.9	2	1
56829	53	1	1	2	4.12	30.63	5.9	0.13	1.75	0.72	41	12.101	5.94	1	1	1	1	2	2	18987.4	19593.1	2	1
40408	49	4	1	2	3.02	29.9	6.5	0.02	2.05	0.32	16	15.467	9.087	2	1	1	1	2	2	27847.2	29449.7	2	1
14109	75	4	1	2	2.06	31.73	6.9	0.68	14.07	1.77	13	14.22	7.549	1	1	1	1	2	2	24968.4	25944.4	1	2
39372	66	3	1	2	3.08	28.06	6	0.02	14.51	1.73	12	15.49	8.536	1	1	1	1	2	2	20460.6	21984.6	1	2
48859	65	4	1	2	1.68	24.18	6	1.56	1.18	0.46	39	11.716	5.051	1	1	1	1	2	2	21378.3	22213.9	2	2
38163	64	1	1	2	3.19	35.47	5.5	0.18	3.02	0.87	29	14.615	8.28	1	1	1	1	2	2	23061.1	23506.3	2	1
38925	63	3	1	2	1.75	29.84	5	0.64	0.9	0.36	40	11.102	6.661	1	1	1	1	2	2	30714.4	32864.6	2	1
50487	54	1	1	2	2.51	32.02	6.4	0.49	5.6	2.05	37	15.602	8.703	1	2	1	1	2	2	20129.8	23782.5	2	1
49058	51	2	1	2	2.4	27.46	5.4	0.13	6.82	1.36	20	11.657	5.773	1	1	1	1	2	2	20593.7	20991.3	2	1
48023	49	3	1	2	2.64	28.31	7.5	1.36	3.45	0.75	22	17.018	9.659	1	1	1	1	2	2	21378.3	22213.9	1	1
55208	48	1	1	2	2.2	31.52	6.1	1.05	1.84	0.65	35	15.239	8.344	1	1	1	1	2	2	20593.7	22127.7	1	1
15437	45	1	1	2	1.28	21.48	5.7	0.79	2.07	0.72	35	14.488	6.661	1	1	1	1	2	2	10846.5	11148.9	2	1
12571	44	4	1	2	2.92	20.22	6.3	0.09	2.89	0.99	34	13.811	5.495	1	1	1	1	2	1	22304.7	28755.2	2	1
40084	77	1	1	2	0.95	31.67	5.8	1.12	4.26	1.1	26	14.377	6.939	1	1	1	1	2	2	11102.3	12197.1	2	1
16823	73	1	1	2	1.68	29.6	5.4	0.84	0.82	0.23	28	14.71	7.438	1	1	1	1	2	2	25948.2	26750.6	2	2
48271	72	3	1	2	3.6	34.04	7.2	0.3	4.42	1.39	31	15.729	9.071	2	1	1	1	2	2	18794.7	20194.7	1	2
46589	69	4	1	2	1.65	30.83	6.9	0.08	3.33	1.4	42	14.666	7.716	1	1	1	1	2	2	10781.5	10989.7	1	1
45815	67	3	1	2	1.92	28.72	6.6	0.02	1.23	0.53	43	17.537	9.936	1	1	1	1	2	2	23061.1	23962.5	2	1
52682	64	1	1	2	1.03	33.38	5.8	0.75	0.07	0.04	57	12.606	6.106	1	1	1	1	2	2	10781.5	11202.9	1	2
41204	60	4	1	2	2.14	27.69	5.6	0.36	10.7	3.2	30	11.546	6.55	1	1	1	1	2	1	18586.7	18791.1	2	1
10390	57	2	3	2	0.82	29.39	6	0.05	0.07	0.04	57	13.544	6.439	2	1	1	1	2	2	11398.7	12264.6	2	2
13800	83	3	2	2	2.2	28.38	6	0.07	2.86	0.73	26	14.239	7.327	2	2	1	1	2	2	10450.7	10884	2	1
34613	69	4	1	2	1.11	29.07	5.4	1.91	0.07	0.04	57	13.378	4.718	1	1	1	1	2	1	9390.77	9780.11	2	1
50370	52	4	1	2	0.82	34.09	6.9	0.28	2.04	0.63	31	15.379	8.287	1	1	1	1	2	2	11792.2	12856.1	2	1
34582	61	4	1	2	2.26	25.65	12.9	0.36	1.4	0.39	28	27.548	17.883	1	2	1	1	2	2	1893.02	2074.64	2	1
10659	40	4	1	2	5	27.78	7.1	0.12	0.31	0.09	29	15.403	8.826	1	1	1	1	2	2	34940.3	34860.6	2	1
46499	80	2	1	2	2.27	43.21	5.4	0.74	2.14	0.46	21	11.102	7.05	2	1	1	1	2	2	41236.4	40961.7	2	1
11359	64	1	1	2	5	23.67	8.8	0.06	1.73	0.54	31	14.401	8.271	1	1	1	1	2	2	39256.7	39719	1	1
46940	62	1	1	2	1.59	28.87	6.6	0.39	1.73	0.48	28	20.15	9.936	2	1	1	1	2	1	43718.5	43427.3	2	1
57369	56	1	1	2	1.43	26.97	6.1	0.85	1.06	0.35	33	16.995	9.548	1	2	1	1	2	2	9507.57	9334.6	2	1
54839	80	3	3	2	3.65	27.15	6.7	0.01	9.78	4.83	49	15.786	8.82	1	1	1	1	2	2	13703.9	14387	2	1
58493	75	3	3	2	2.19	23.33	7.3	0.25	5.21	1.46	28	26.158	14.821	2	1	1	1	2	1	6078.55	6207.91	1	1
47377	53	5	3	2	1.74	29.18	4.7	0.19	2.07	1.21	58	16.1	9.415	1	1	1	1	2	2	7720.32	7580.58	1	2
53790	47	3	3	2	1.51	32.27	5.5	0.12	2.86	0.95	33	10.212	4.663	1	2	1	1	2	2	10680.5	11549	2	1
18458	83	3	2	2	0.75	29.95	7.7	1.81	3.95	1.61	41	13.627	7.383	2	1	1	1	2	2	10680.5	11329.1	2	1
32696	69	4	2	2	1.17	29.91	5.1	0.17	3.83	0.56	15	15.13	8.458	2	1	1	1	2	2	9471.57	9386.12	2	1
49193	64	1	2	2	5	42.69	7.7	0.53	1.91	0.77	40	14.403	8.814	1	1	1	1	2	2	33722.5	34298.5	1	1
44275	62	4	2	2	1.43	29.66	7.5	0.18	4.56	1.7	37	10.931	5.273	1	1	1	1	2	2	50975.4	50635.9	1	2
48844	62	3	2	2	1.17	23.38	6.9	0.58	0.58	0.27	47	11.723	5.329	2	1	1	1	2	2	31035.5	31071.4	1	2
45262	61	4	2	2	4.37	31.74	6.3	0.14	2.12	0.36	17	12.966	6.994	1	1	1	1	2	2	11522.5	12397.8	2	1
32035	60	4	2	2	1.13	24.81	7.2	0.06	4.4	1.05	24	11.139	4.829	1	1	1	1	2	2	6745.2	7074.72	1	2
46509	56	4	2	2	1.29	33.62	6.1	0.39	1.43	0.35	24	15.339	6.772	1	1	1	1	2	1	11792.2	12529.4	2	1
12981	56	1	2	2	1.43	38.66	6.4	0.43	1.72	0.81	47	14.756	8.346	1	1	1	1	2	2	9938.61	11112.9	2	1
58971	49	3	2	2	1.71	25.74	6.8	1.12	1.61	0.74	46	15.999	8.865	1	1	1	1	2	2	33426.5	34125.4	1	1
13327	46	1	2	2	1.32	32.87	6.3	0.31	1.77	0.84	47	12.656	6.328	2	1	1	1	2	2	10273.8	11389.1	2	1
35482	40	3	2	2	1.48	40.17	6.3	1.91	1.34	0.3	22	13.6	7.549	2	2	1	1	2	2	14556	15661.8	2	1
45829	80	3	1	2	3.41	26.9	6.9	2.79	0.83	0.32	39	16.173	9.389	1	1	1	1	2	2	11928.2	11712.3	2	1
36631	76	3	1	2	1.62	30.51	8.1	0.06	7.03	1.23	17	19.63	10.047	1	2	1	1	2	1	14745.4	14478.5	1	1
49912	75	3	1	2	1.5	33.39	5.9	0.2	1.65	0.36	22	15.41	8.612	1	1	1	1	2	2	8950.85	8788.84	2	1
49825	68	3	1	2	0.88	25.91	7.6	0.07	4.23	1.02	24	16.095	8.763	2	2	1	1	2	2	10432.6	12030	2	1
40643	67	1	1	2	2.33	30.86	6.5	0.23	2.1	0.57	27	15.559	8.559	2	1	1	1	2	2	41876.2	41780.7	2	1
13478	66	4	1	2	2.19	29.64	6.3	0.09	0.42	0.15	36	15.545	8.759	2	1	1	1	2	2	28153.1	28484.6	2	2
59692	65	3	1	2	2.92	26.27	5.8	0.08	1.73	0.66	38	15.814	9.075	1	1	1	1	2	2	41946.5	44942.2	2	1
37311	62	3	1	2	3.23	26.26	5.5	0.68	2.25	0.77	34	12.268	5.329	2	1	1	1	2	2	40574.7	40482.1	2	1
59260	60	1	1	2	1.96	28.38	6.7	0.02	0.49	0.25	51	10.714	5.495	2	1	1	1	2	2	8946.3	9120.74	2	1
14168	54	2	1	2	1.96	33.83	6.3	0.28	0.7	0.34	49	12.993	7	2	2	1	1	2	2	4430.47	4855.52	2	1
38384	53	4	1	2	1.02	30.75	6.4	0.23	1.42	0.58	41	15.632	8.572	1	1	1	1	2	2	6078.55	6626.96	2	1
42817	51	1	1	2	1.1	26.76	7.6	0.13	4.19	0.94	22	16.456	8.757	2	1	1	1	2	2	34940.3	34860.6	2	1
47069	49	3	1	2	5	27.2	6	0.08	4.5	0.21	5	16.028	9.256	1	1	1	1	2	2	14731.4	15929.3	1	2
50396	47	1	1	2	1.19	25.3	7.1	0.04	0.9	0.41	46	16.746	9.687	1	2	1	1	2	2	11879	12699.5	1	2
44648	80	3	1	2	1.26	34.91	6.6	0.09	2.6	1.1	42	15.304	8.693	1	1	1	1	2	2	11879	14175.4	1	2
15805	73	3	1	2	1.48	52.02	6.2	0.21	0.64	0.44	69	11.143	5.995	2	1	1	1	2	2	11383	11177	2	1
45025	67	3	1	2	4.46	30.67	7.3	0.06	0.56	0.21	38	15.472	8.936	1	2	1	1	2	2	35221.9	35141.5	2	1
42985	63	3	1	2	3.5	28.69	5.8	0.2	1.17	0.44	38	12.586	6.328	1	1	1	1	2	2	35221.9	35141.5	2	1
57181	62	3	1	2	2.01	33.72	7	0.15	1.5	0.43	29	14.435	8.241	1	1	1	1	2	2	32688.4	34479.4	2	1
40235	61	1	1	2	3.84	27.88	6.3	0.45	6	1.02	17	15.939	9.547	1	1	1	1	2	2	24188.7	25718.1	2	2
20140	52	4	1	2	3.66	38.75	8.2	0.32	0.37	0.14	38	17.232	10.88	1	2	1	1	2	2	51637	51293	2	1
58647	51	4	1	2	1.54	30.21	6.5	1.45	0.24	0.07	29	21.836	13.822	1	1	1	1	2	2	9935.27	10270.3	1	2
46449	51	4	1	2	2.75	35.71	5.7	0.23	4.71	0.84	18	11.602	6.828	2	1	1	1	2	2	40574.7	40482.1	2	1
51332	51	4	1	2	1.76	29.48	6.9	0.09	4.1	1.41	34	16.338	7.554	1	1	1	1	2	1	23624.1	27910.9	2	1
43825	49	4	1	2	1.57	25.31	6.4	0.16	0.97	0.19	20	21.038	12.545	2	2	1	1	2	2	32312.2	33401.7	1	2
31609	44	1	1	2	0.43	25.19	7.6	0.12	0.43	0.11	26	16.174	8.632	1	1	1	1	2	2	16026.6	15919.8	2	1
34910	85	3	1	2	1.16	24.79	6.2	0.04	0.8	0.41	51	16.92	9.193	2	1	1	1	2	2	6033.61	6259.02	2	2
11507	85	1	1	2	1.57	25.47	8.1	0.1	3.66	0.7	19	18.798	10.658	1	1	1	1	2	2	11398.7	11966.8	1	1
13867	81	1	1	2	1.02	25.97	6.8	0.22	1.58	0.98	62	16.708	7.994	1	1	1	1	2	1	14745.4	14478.5	1	1
61204	80	3	1	2	0.62	23.54	6.6	0.61	15.92	2.56	16	16.88	8.837	1	2	1	1	2	2	14943.8	16159	2	1
60958	80	1	1	2	2.24	31.84	5.9	6.62	0.93	0.38	41	12.157	6.217	1	1	1	1	2	2	40704.5	40938.9	2	1
46650	80	1	1	2	3.09	32.7	6.1	0.11	1.84	1.01	55	14.618	8.14	1	1	1	1	2	2	35221.9	35823.5	1	1
34266	76	4	1	2	3.03	45.74	5.8	0.05	4.81	1.63	34	13.332	6.162	2	2	1	1	2	1	43718.5	44231.2	2	1
61380	74	1	1	2	4.66	32.85	6	0.71	2.1	0.46	22	16.203	10.044	1	2	1	1	2	2	27124.1	28610.2	2	2
47636	74	1	1	2	3.6	28.22	6.1	0.15	2.99	0.67	22	16.556	9.411	1	2	1	1	2	2	38549.2	38461.2	2	1
34873	73	4	1	2	0.96	29.45	6	0.07	7.92	1.91	24	15.709	7.327	1	1	1	1	2	1	25749.9	26429.9	2	1
20272	73	3	1	2	0.86	26.07	6.1	0.08	0.21	0.04	19	12.628	5.773	1	1	1	1	2	2	6077.3	6097.19	2	1
49375	71	1	1	2	0.06	31	8	0.01	8	3.8	48	12.328	6.3	1	1	1	1	2	2	6117.21	7286.36	1	1
46656	70	3	1	2	1.48	31.57	6.4	0.12	3.44	0.62	18	17.033	9.548	2	2	1	1	2	2	11743.7	12635.9	2	1
38870	70	1	1	2	0.83	24.95	7.3	0.15	2.6	0.45	17	17.1	9.422	1	2	1	1	2	2	3920.96	3979.52	2	1
49704	69	3	1	2	1.81	24.05	8.3	0.37	5.23	0.73	14	16.604	8.937	1	1	1	1	2	2	10680.5	11549	2	1
46123	69	3	1	2	0.55	22.83	7.3	0.22	2.59	0.85	33	16.729	8.873	2	1	1	1	2	2	10752.8	10558.2	2	2
46392	69	2	1	2	2.85	34.04	7.3	0.26	0.8	0.3	38	18.986	11.95	2	2	1	1	2	2	26883.2	29826.2	2	1
54610	69	1	1	2	3.76	32.58	7.4	0.14	3.77	1.23	33	14.974	8.511	2	1	1	1	2	2	28639.6	29991.3	2	1
18110	65	1	1	2	1.06	27.86	6.5	0.06	0.9	0.41	46	15.496	8.751	2	1	1	1	2	2	11503.7	11953.6	2	1
34812	63	1	1	2	3.79	37.67	7	0.19	1.22	0.35	29	15.644	9.77	1	2	1	1	2	2	39086.2	38825.9	2	1
51967	61	1	1	2	4.12	28.22	8.5	0.4	3.1	1.05	34	16.529	9.47	2	1	1	1	2	2	30302.3	30233.2	1	2
55411	55	1	1	2	0.8	31.16	11.5	0.89	0.3	0.09	30	16.663	7.6	1	2	1	1	2	1	12219	14630.9	1	2
47005	53	3	1	2	3.2	36.45	7.5	0.75	1.59	0.6	38	14.5	8.246	1	1	1	1	2	2	11398.7	11966.8	1	2
57475	52	1	1	2	1.95	22.02	5.7	0.16	1.3	0.25	19	16.65	8.851	1	1	1	1	2	2	8932.39	9611	2	2
42613	52	1	1	2	0.7	32.25	7.3	1.5	5.12	1.41	28	23.294	15.154	1	1	1	1	2	2	7101.45	10774.9	1	1
33153	82	3	3	2	1.24	32.29	5.7	0.2	2.56	0.77	30	15.939	8.697	1	2	1	1	2	2	8593.83	9246.72	2	1
39064	81	3	3	2	1.7	31.29	8.3	0.36	1.85	0.51	28	18.104	10.658	1	1	1	1	2	2	5754.01	5876.46	2	1
53262	80	5	3	2	0.92	27.78	7	0.03	1.33	0.26	20	15.075	8.143	1	1	1	1	2	2	8981.53	9134.93	2	1
45596	80	4	3	2	2.06	24.25	5.7	1.99	0.46	0.1	22	11.435	6.273	2	1	1	1	2	2	9926.84	10026.5	2	1
43743	80	3	3	2	2.91	35.33	7	1.26	1.25	0.25	20	14.251	8.327	2	2	1	1	2	2	10810.2	11516.9	1	1
53616	80	3	3	2	3.41	27.05	6	0.04	3.16	0.94	30	15.126	8.853	1	1	1	1	2	2	8871.5	10007.1	2	1
52577	78	3	3	2	0.7	25.5	11.2	0.31	38.2	7.02	18	16.77	9.647	1	1	1	1	2	2	9387.63	10036.1	2	1
37682	74	3	3	2	1.21	26.28	5.9	0.38	1.29	0.54	42	13.711	7.327	2	1	1	1	2	2	10561.9	10847.2	2	1
19878	73	3	3	2	2.13	28.4	6.4	0.08	1.66	0.54	33	14.433	7.494	2	2	1	1	2	2	30302.3	30233.2	2	1
53251	72	5	3	2	2.5	26.46	7.2	0.16	0.6	0.26	43	15.723	8.929	1	1	1	1	2	2	32688.4	39892.9	2	1
47106	72	4	3	2	2.8	28.23	7.3	1.47	2	0.55	28	17.846	8.972	1	1	1	1	2	1	29231.8	30833.4	2	1
49003	71	3	3	2	3.27	33.55	7.5	0.15	1.42	0.52	37	15.938	9.714	1	1	1	1	2	2	36500.6	36479.7	2	1
59412	71	3	3	2	2.71	32.51	6.6	0.87	0.5	0.28	56	9.357	3.761	1	1	1	1	2	2	11870.3	14024.2	2	1
41514	70	3	3	2	1.58	34.49	8.4	0.11	0.58	0.26	45	15.872	8.983	1	2	1	1	2	2	12785.5	12709.1	2	1
38986	66	5	3	2	2.96	29.46	5.8	0.18	0.79	0.26	33	11.657	5.94	1	1	1	1	2	2	3877.55	5883.34	2	1
37667	65	4	3	2	0.74	30.59	7	0.92	1.9	0.35	18	16.192	9.429	1	1	1	1	2	2	1950.13	2322.85	1	1
10260	64	1	3	2	1.6	31.28	6	0.35	1.8	0.58	32	15.706	8.769	1	1	1	1	2	2	2609.74	3487.97	2	1
56212	63	5	3	2	0.76	37.53	7.2	0.42	3.36	0.65	19	15.083	8.635	1	1	1	1	2	2	8384.65	8232.11	1	1
32229	61	4	3	2	1.16	23.68	6.3	0.06	1.74	0.28	16	15.979	8.301	1	1	1	1	2	2	11612.7	12272.4	2	1
58405	61	1	3	2	3.69	25.59	9.4	0.31	8.4	1.3	15	16.807	9.797	1	1	1	1	2	2	9938.61	11112.9	1	2
53759	60	3	3	2	1.37	23.96	8.1	0.02	5.25	0.8	15	18.102	9.992	2	1	1	1	2	2	11983.6	13399.5	1	1
10321	52	3	3	2	1.07	38.99	6.9	1.58	0.7	0.32	46	15.487	9.381	1	1	1	1	2	2	12388.1	12599.7	2	1
20252	44	3	3	2	1.72	30.79	7.2	0.06	2.53	0.7	28	14.909	7.985	1	1	1	1	2	2	41159.8	41862.8	1	1
33080	44	3	3	2	0.52	24.54	5.3	3.01	3.34	0.82	25	14.71	6.772	1	1	1	1	2	2	20334.3	20198.9	2	2
11130	82	3	2	2	1.24	32.85	6.5	0.54	0.54	0.24	44	15.155	8.489	1	1	1	1	2	2	13047	13269.9	2	1
45724	73	4	2	2	1.5	30.05	9.5	0.07	1.62	0.65	40	15.467	8.69	1	2	1	1	2	2	9935.27	10074.2	2	1
39861	63	4	2	2	0.58	25.83	5.5	0.11	1.22	0.33	27	16.653	6.828	2	1	1	1	2	2	10263.8	11189.8	2	1
58802	62	2	2	2	4.65	34.76	7.4	0.15	0.6	0.39	65	16.17	8.301	2	2	1	1	2	1	9547.7	9994.13	2	1
33934	57	3	2	2	4.33	29.65	6.8	0.14	5.75	1.95	34	16.339	8.829	1	1	1	1	2	1	30137	31072.5	2	1
17150	54	4	2	2	5	24.74	7.1	0.05	2.25	0.52	23	17.063	8.715	2	1	1	1	2	1	32961.5	35315.5	2	2
48297	53	3	2	2	2.48	33.05	6.2	3.02	0.68	0.2	29	13.137	7.383	1	2	1	1	2	2	28153.1	28102.6	2	1
56083	52	4	2	2	5	28.36	6.4	0.25	0.54	0.2	37	15.262	9.332	1	1	1	1	2	2	37173.1	36925.5	2	2
48949	51	3	2	2	5	35.24	5.4	0.17	6.55	1.15	18	11.324	6.051	1	1	1	1	2	1	43718.5	43970.3	2	1
17755	49	1	2	2	0.68	27.31	5.8	0.5	0.1	0.04	40	12.164	6.072	1	2	1	1	2	2	14463	15142.2	2	1
40726	48	3	2	2	2.86	31.12	5.9	0.28	0.76	0.13	17	11.602	6.495	2	1	1	1	2	2	9935.27	10074.2	2	1
37947	44	3	2	2	3.09	33.34	6.6	0.33	0.32	0.17	53	15.174	8.555	1	1	1	1	2	2	33722.5	33645.6	2	1
33187	41	4	2	2	0.97	25.44	6.1	0.08	0.86	0.35	41	9.32	3.386	2	1	1	1	2	2	10621.8	12248.2	2	1
55212	72	3	1	2	1.22	28.54	7	0.31	1.27	0.27	21	13.94	6.883	1	2	1	1	2	2	11769.7	11970.7	2	1
52444	71	4	1	2	1.93	44.48	7.8	0.12	3.4	1.32	39	14.192	8.238	1	1	1	1	2	2	31028.9	37153.6	1	2
43945	70	3	1	2	2.75	31.91	9	0.6	3.87	1.2	31	20.967	12.934	2	2	1	1	2	2	14556	15281.5	2	1
50365	64	3	1	2	2.88	23.99	6.1	0.06	0.65	0.21	32	12.545	6.439	2	1	1	1	2	2	4697.31	5249.82	2	1
44579	59	4	1	2	1.42	39.18	7.6	0.08	3.77	1.1	29	14.192	7.882	2	2	1	1	2	2	8950.98	11451.4	2	1
15740	53	4	1	2	1.01	26.5	6.9	0.04	2.7	0.93	34	16.393	8.955	2	2	1	1	2	2	3120.99	3237.59	2	1
51819	80	3	1	2	2.18	27.65	6.4	0.18	2.99	0.43	14	16.205	9.112	1	1	1	1	2	2	3251.36	4933.24	2	2
35826	72	1	1	2	4.15	21.36	5.8	0.16	1.21	0.36	30	13.469	6.717	1	2	1	1	2	2	46157.5	50306.9	2	1
59223	71	4	1	2	2.53	42.44	6.9	0.15	0.4	0.36	90	13.469	8.066	1	2	1	1	2	2	10909.9	11338.3	2	1
16643	69	3	1	2	5	36.6	7	0.38	0.15	0.05	33	17.525	10.103	1	1	1	1	2	1	6019.82	6097.94	2	1
56827	53	2	1	2	3.46	26.77	6.7	2.9	0.93	0.21	23	15.099	7.993	1	2	1	1	2	2	12164.2	12460.8	2	1
17301	61	4	1	2	2.25	34.94	7	0.35	1.06	0.28	26	14.71	9.492	1	1	1	1	2	2	8412.93	8365.16	2	1
60848	80	5	3	1	0.61	36.24	8.4	0.53	0.46	0.07	15	14.874	8.566	1	2	1	1	2	2	9714.12	9950.96	2	1
36849	80	3	3	1	0.73	29.04	10.8	0.48	0.5	0.12	24	14.885	8.16	1	1	1	1	2	2	10725.8	11522.3	2	1
52532	80	3	3	1	1.04	38.38	6	0.48	1.62	0.53	33	14.405	8.049	1	1	1	1	2	2	7043.12	6890.99	2	1
47594	80	3	3	1	1.61	31.31	6.4	0.15	1.61	0.26	16	16.097	7.417	1	1	1	1	2	1	10497.3	11798.7	2	1
50537	80	2	3	1	0.99	30.93	6.5	0.31	0.79	0.36	46	12.7	6.661	2	1	1	1	2	2	7963.93	8380.58	2	1
51976	79	3	3	1	1.45	26.42	6.3	0.36	1.74	0.43	25	11.31	5.329	1	1	1	1	2	2	5758.08	5905.35	2	1
60735	75	3	3	1	0.58	28.54	7.7	0.13	0.37	0.21	57	16.213	8.85	2	1	1	1	2	2	7750.96	8156.46	2	1
40318	74	5	3	1	5	24.15	6	2.07	7.52	1.76	23	13.76	6.828	1	1	1	1	2	1	47908.5	46872.2	2	2
50507	74	2	3	1	2.57	38.12	6.6	1.26	13.98	6.07	43	13.936	8.139	2	1	1	1	2	2	79633.3	78681.8	1	1
17365	74	1	3	1	0.89	27.55	5.6	0.03	0.39	0.09	23	14.372	7.605	1	1	1	1	2	2	19360.6	19562.5	2	1
56784	72	3	3	1	1.58	30.1	9.1	0.23	1.4	0.34	24	25.881	16.911	1	1	1	1	2	2	43867.8	53536.3	2	1
20896	71	3	3	1	0.88	31.41	6.9	0.26	0.85	0.51	60	16.739	9.437	1	1	1	1	2	2	18457	18413.6	2	1
49723	70	3	3	1	0.44	41.57	7.2	0.57	0.49	0.19	39	15.029	6.715	1	1	1	1	2	1	15165.3	16829.7	2	1
43558	69	3	3	1	0.93	31.62	6.2	0.06	1.4	0.77	55	12.575	5.995	1	1	1	1	2	2	7351.05	7591.78	2	1
10638	69	3	3	1	4.53	43.36	5.8	1.31	0.69	0.34	49	13.933	7.327	1	1	1	1	2	1	6712.86	6710.31	2	1
10101	68	4	3	1	0.69	23.94	9.4	0.2	0.93	0.58	62	18.293	8.771	1	1	1	1	2	1	7297.43	8079.51	2	1
36401	66	3	3	1	2.49	35.81	6	0.36	3.03	0.35	12	13.267	6.328	1	1	1	1	2	1	9286.36	9282.84	2	1
44329	66	2	3	1	0.78	30.76	6.6	0.14	6.7	1.61	24	15.114	8.493	1	1	1	1	2	2	5821.78	5819.58	2	1
61078	65	3	3	1	1.28	26.44	7.9	0.08	1	0.36	36	24.835	14.344	1	1	1	1	2	1	6471.66	6918.71	2	1
60183	65	3	3	1	4.26	30.22	7.9	0.18	2.27	0.55	24	10.029	4.496	1	2	1	1	2	2	11036.7	10974	2	1
55662	65	3	3	1	5	37.14	6	0.09	2.6	0.4	15	15.521	9.539	2	1	1	1	2	2	7397.06	8126.65	2	1
38669	65	3	3	1	4.25	37.28	6.3	0.16	3.28	0.59	18	14.954	9.644	1	1	1	1	2	2	59047.1	58644.2	2	1
38138	65	1	3	1	2.32	38.18	6.3	0.49	0.53	0.37	70	10.071	5.218	1	1	1	1	2	2	54622.6	68146.6	1	2
57164	64	3	3	1	0.96	28.59	9.3	2.15	0.07	0.04	57	15.617	8.564	1	1	1	1	2	2	23784.9	23622.7	2	1
55180	62	4	3	1	1.46	23.91	6.7	0.09	3.54	0.91	26	16.935	7.713	1	1	1	1	2	1	19605.9	20196.1	2	1
34483	62	3	3	1	1.05	30.69	5.6	0.06	1	0.52	52	16.238	9.531	1	1	1	1	2	2	38036.6	46419.9	2	1
48623	62	3	3	1	2.5	32.39	6.3	0.01	1.61	0.53	33	12.832	6.495	2	1	1	1	2	2	5543.29	5724.82	2	1
59213	62	1	3	1	2.13	26.35	6.9	0.23	1.99	0.75	38	16.471	8.954	1	1	1	1	2	2	5428.83	5470.46	2	2
44517	61	3	3	1	1.03	31.6	6.7	0.06	0.24	0.1	42	15.415	8.215	1	1	1	1	2	2	68230.9	68602.4	2	1
45028	61	3	3	1	3.98	29.14	5.9	0.55	3.51	0.22	6	11.714	5.718	2	1	1	1	2	2	8577.51	8634.15	2	1
49416	61	3	3	1	3.86	33.24	6.7	3.09	1.89	0.17	9	17.814	10.824	1	1	1	1	2	2	7750.96	7944.07	2	1
12963	60	5	3	1	5	30.08	7	0.17	3.22	0.86	27	16.153	9.466	2	1	1	1	2	2	8412.93	8334.2	2	1
57569	60	4	3	1	4.09	29.81	7.7	0.11	0.51	0.25	49	15.862	9.078	1	1	1	1	2	2	6530.19	6488.13	2	1
39116	60	4	3	1	0.94	34.35	5.9	0.52	0.75	0.07	9	14.717	8.104	2	1	1	1	2	2	9716.92	9953.83	2	1
12146	60	4	3	1	1.98	36.14	7.6	0.15	2.3	1.55	67	15.186	8.744	1	2	1	1	2	2	9387.63	11202.5	1	1
16392	60	3	3	1	1.45	37.97	6.1	1.15	0.56	0.27	48	12.092	6.217	1	1	1	1	2	2	9188.77	9871.09	2	1
10699	60	3	3	1	5	29.94	5.7	0.83	0.55	0.22	40	15.626	9.095	1	1	1	1	2	2	63430.5	62997.7	2	2
37857	59	3	3	1	0.82	28.98	6	0.42	1.51	0.3	20	12.101	6.162	1	1	1	1	2	2	18242.6	19098.9	2	1
48889	59	2	3	1	3.77	32.92	7	0.33	0.97	0.33	34	16.264	7.938	1	1	1	1	2	1	55161.2	54784.8	2	2
59206	58	3	3	1	1.12	31.5	6.3	0.66	5.07	1.37	27	16.278	7.711	1	1	1	1	2	1	21648.7	21180.4	2	1
50280	58	2	3	1	1.11	27.76	6.9	0.09	0.4	0.18	45	16.678	7.503	2	1	1	1	2	1	30515	32186.9	1	1
51909	55	4	3	1	1.64	24.29	7.8	0.47	0.19	0.04	21	15.669	8.438	1	1	1	1	2	2	19360.6	18941.8	1	1
61266	55	3	3	1	1.52	27.77	6	1.47	24.21	2.52	10	10.233	4.33	1	1	1	1	2	2	63593.8	62833.9	1	2
34605	53	3	3	1	1.95	32.01	7.4	0.27	2.67	1.31	49	14.659	8.328	1	1	1	1	2	2	4718.56	4441.46	1	2
43836	52	4	3	1	1.24	22.7	6.1	0.12	0.81	0.37	46	15.926	8.672	1	1	1	1	2	2	3251.36	3055.18	2	1
42050	52	3	3	1	1.09	29.16	6	5.53	0.67	0.2	30	11.99	6.772	1	1	1	1	2	2	6050.58	6437.95	2	2
40933	52	1	3	1	1.71	26.38	5.8	0.03	0.35	0.13	37	16.67	9.335	2	1	1	1	2	2	9618.8	10649.7	2	2
50454	49	4	3	1	5	33.76	6.3	0.08	2.39	0.54	23	15.885	9.825	1	1	1	1	2	2	12079.2	12159	2	1
45840	49	4	3	1	5	28.14	5.6	0.09	3.99	0.61	15	15.922	9.988	1	1	1	1	2	2	7338.01	7433.24	2	1
11309	49	3	3	1	1.14	44.06	6.5	1.49	0.7	0.17	24	14.445	6.672	2	2	1	1	2	1	8058.69	7920.81	2	1
58394	48	4	3	1	0.74	28.12	5.4	0.39	0.71	0.43	61	15.633	8.51	1	1	1	1	2	2	10270	10764.5	2	2
58867	47	5	3	1	3.72	33.26	7.8	0.58	1.7	0.69	41	14.611	8.606	1	1	1	1	2	2	10559.1	12432.7	2	1
37569	47	2	3	1	2.82	47.11	6.1	0.05	2.56	0.78	30	13.362	8.067	1	1	1	1	2	2	6554.89	6512.67	2	1
13767	47	2	3	1	1.25	27.37	12.2	0.32	1.31	0.26	20	26.983	17.652	1	1	1	1	2	2	7750.96	8156.46	2	1
35157	46	4	3	1	1.2	26.92	6.3	1.31	0.67	0.36	54	12.379	6.828	2	1	1	1	2	2	9714.12	9950.96	2	1
14539	46	3	3	1	5	31.13	8.5	0.3	1.07	0.21	20	16.32	10.005	1	2	1	1	2	2	7289.41	7960.36	2	1
36468	43	3	3	1	1.26	27.37	6.8	0.06	1.3	0.22	17	18.979	9.4	2	2	1	1	2	1	27159.2	32087.4	2	1
53569	40	3	3	1	5	29.7	9.3	0.77	0.33	0.09	27	12.398	7.272	1	1	1	1	2	2	6766.95	6764.39	1	1
54296	80	3	2	1	0.75	26.97	6.4	0.21	1	0.53	53	11.805	5.607	2	1	1	1	2	2	6554.44	6974.06	2	1
61809	80	2	2	1	4.13	26.25	4.5	0.14	3.78	1.33	35	16.117	7.983	1	1	1	1	2	1	7775.48	8491.16	2	1
31897	79	3	2	1	4.18	38.36	5.9	0.14	2.48	1.01	41	15.032	9.261	2	1	1	1	2	2	9263.82	9951.71	1	2
61764	79	2	2	1	1.42	29.57	6.3	0.53	1.35	0.28	21	12.545	5.884	1	1	1	1	2	2	9938.91	9780.42	2	2
49707	78	3	2	1	2.97	22.41	10.7	0.05	1.18	0.47	40	16.672	9.757	2	1	1	1	2	2	27650.8	27305.4	1	2
15380	78	3	2	1	3.92	34.85	6.3	0.69	3.02	0.67	22	15.062	9.259	2	2	1	1	2	2	81505.8	86861.9	2	1
32193	76	3	2	1	3.09	33.37	7.5	1.12	0.9	0.17	19	15.393	8.771	2	1	1	1	2	2	59047.1	58644.2	2	1
13673	75	1	2	1	5	35.37	7.3	0.26	0.61	0.22	36	17.874	8.937	1	1	1	1	2	1	55161.2	54784.8	2	1
37825	74	3	2	1	3.79	36.88	9.8	1.43	0.83	0.25	30	14.046	8.522	1	1	1	1	2	2	74056.8	78903.2	1	2
50383	74	3	2	1	1.23	39.94	6.4	0.2	3.3	0.83	25	11.514	6.083	1	2	1	1	2	2	26530.4	31344.5	2	1
60308	73	3	2	1	1.47	42.2	9.4	0.48	0.7	0.2	29	20.883	13.567	1	1	1	1	2	2	53340.6	63869.4	1	2
41973	71	3	2	1	0.74	24.49	7.1	1.03	1.02	0.35	34	15.66	8.715	1	1	1	1	2	2	22416.9	22325.7	2	1
13338	71	1	2	1	3.18	36.09	7.6	0.69	0.89	0.32	36	15.321	8.493	2	2	1	1	2	2	67421.6	67849.1	2	1
37033	70	4	2	1	2.77	25.3	6.5	0.35	1.37	0.63	46	16.353	9.287	1	1	1	1	2	2	8135.5	8401.91	1	2
31765	70	3	2	1	1.27	28.27	6.3	0.04	1.27	0.31	24	16.392	9.104	1	2	1	1	2	2	5134.79	5934.24	2	1
56520	69	5	2	1	2.41	29.21	11.9	0.25	1.43	0.45	31	15.302	8.776	2	2	1	1	2	2	10415.5	9787	2	1
48492	69	4	2	1	1.77	35.75	9.9	0.56	0.33	0.11	33	14.154	8.064	1	1	1	1	2	2	4433.67	4166.15	1	2
49105	69	4	2	1	2.88	36.18	5.6	0.23	2.32	0.39	17	14.792	8.374	1	1	1	1	2	2	9286.36	9357.58	1	1
15618	69	1	2	1	1.01	27.08	9.9	0.91	2.76	1	36	15.857	8.338	1	1	1	1	2	2	6609.43	6660.12	1	2
59985	67	4	2	1	0.78	35.48	6.2	0.88	1.75	0.36	21	12.989	7.771	1	1	1	1	2	1	10415.5	10769.3	2	1
44208	67	4	2	1	0.73	26.15	8.1	0.1	1.5	0.65	43	15.722	8.806	1	1	1	1	2	2	9278.95	11072.8	1	1
46085	67	3	2	1	3.83	37.64	9.6	0.31	1.47	0.58	39	14.564	8.766	2	1	1	1	2	2	6933.44	7106.18	2	1
60489	67	3	2	1	2.14	47.09	10.6	0.97	0.99	0.26	26	12.896	7.659	1	1	1	1	2	2	6527.94	6690.58	1	1
54738	67	3	2	1	5	41.02	7.4	0.46	0.77	0.21	27	10.736	6.273	1	1	1	1	2	2	7750.96	7944.07	2	1
31442	67	1	2	1	2.33	31.28	6.9	0.26	2.8	0.74	26	13.634	7.572	1	1	1	1	2	2	8409.78	9233.62	2	1
41483	66	4	2	1	2.19	29.48	6.1	0.15	7.7	1.35	18	12.196	6.139	2	2	1	1	2	2	8520.6	8855.25	2	1
56960	66	1	2	1	0.73	25.92	5.6	0.05	3.11	0.68	22	14.164	7.216	1	1	1	1	2	2	7237.07	7008.32	2	1
36853	65	4	2	1	2.45	29.87	8.8	0.17	3.13	0.76	24	12.465	6.439	1	1	1	1	2	2	7237.07	7080.74	2	1
43720	64	4	2	1	1.06	37.82	8.2	0.1	1.3	0.52	40	13.783	7.726	1	1	1	1	2	2	36492.5	36056.4	2	1
15146	64	4	2	1	1.36	28.25	7.3	0.18	0.62	0.24	39	16.658	9.603	1	1	1	1	2	2	31962	34053.7	2	1
54152	64	3	2	1	2.64	28.38	6.7	0.09	0.93	0.23	25	15.768	8.663	1	1	1	1	2	2	82137	80360.3	1	2
35420	64	3	2	1	1.36	26.83	11.2	0.57	1.41	0.18	13	27.2	15.654	1	1	1	1	2	1	66541.1	65746	2	1
31734	64	1	2	1	3.73	35.39	8.3	0.28	0.7	0.28	40	19.649	12.539	1	1	1	1	2	2	38036.6	45544.5	1	2
53518	63	4	2	1	3.18	33.4	4.5	0.22	1.09	0.24	22	11.824	7.383	1	1	1	1	2	2	74056.8	74086.8	2	2
61486	63	1	2	1	5	31.88	6.4	0.25	0.37	0.09	24	13.792	8.493	1	1	1	1	2	2	7101.45	6672.96	2	1
12064	62	5	2	1	5	32.63	5.5	0.06	7.58	1.51	20	12.532	5.551	1	1	1	1	2	1	9618.8	9947.06	2	1
31441	62	4	2	1	1.21	34.99	7.1	1.03	0.4	0.19	48	11.826	6.162	1	1	1	1	2	2	12193.3	11477.2	1	1
61460	62	2	2	1	0.57	26.33	5.6	0.07	2.1	0.25	12	12.45	5.439	2	1	1	1	2	2	2484.12	3320.08	2	1
42123	61	2	2	1	2.07	39.58	9.8	0.46	0.12	0.04	33	21.286	13.544	1	1	1	1	2	2	5848.9	6223.35	2	1
60896	60	4	2	1	5	25.07	6.2	0.03	0.86	0.35	41	16.21	9.287	2	1	1	1	2	2	56929.9	57239.9	2	1
61904	60	4	2	1	1.21	26.43	4.7	0.11	7.49	1.9	25	12.268	5.273	2	1	1	1	2	2	34047.6	39510.8	2	1
45894	60	3	2	1	5	36.77	6.4	0.53	3.44	0.82	24	12.069	7.105	2	1	1	1	2	2	7237.07	7073.79	2	1
41268	59	4	2	1	1.5	26.34	5.2	0.35	1.61	1	62	15.703	7.05	1	2	1	1	2	1	9714.12	9950.96	2	1
48018	59	1	2	1	1.57	28.67	5	0.75	1.97	0.41	21	15.137	8.019	1	1	1	1	2	2	8577.51	8990.49	2	1
57343	58	4	2	1	1.47	37.46	8.8	0.45	1.3	0.41	32	13.9	7.882	1	1	1	1	2	2	8512.29	8846.62	2	1
48496	58	4	2	1	3.06	29.82	5.4	0.45	0.77	0.22	29	15.086	8.785	1	1	1	1	2	2	10725.8	11522.3	2	2
38469	58	3	2	1	1.24	51.91	6.9	0.17	1	0.12	12	13.889	6.514	2	2	1	1	2	1	6564.94	8106.82	2	1
49879	58	3	2	1	1.36	30.37	7.6	0.55	2.75	0.58	21	15.209	8.104	1	1	1	1	2	2	12001.4	12579.3	2	1
55918	57	1	2	1	0.99	30.99	8	0.17	0.1	0.06	60	15.985	9.215	2	1	1	1	2	2	9714.12	9950.96	2	1
59117	56	4	2	1	1.76	34.28	7.2	0.13	2.01	0.41	20	15.499	8.893	1	1	1	1	2	2	7237.07	7080.74	1	1
40850	56	3	2	1	1.04	29.37	8.2	0.11	0.9	0.31	34	21.635	11.444	1	2	1	1	2	1	10771.3	10952.4	1	1
47793	56	1	2	1	4.07	27.98	5.1	0.21	2.5	0.49	20	11.269	5.884	1	1	1	1	2	2	47720.4	50277.5	2	1
56339	55	4	2	1	2.59	33.2	7.5	0.48	0.89	0.33	37	16.632	9.936	2	1	1	1	2	2	51725.4	56375.4	2	1
59972	55	3	2	1	0.95	25.75	7.8	0.28	0.54	0.14	26	16.213	8.881	1	2	1	1	2	2	19060.5	18648.2	2	1
43683	54	3	2	1	0	26.58	6.1	0.09	0.46	0.18	39	19.429	8.604	2	2	1	1	2	2	7817.36	8326.73	2	2
31337	54	3	2	1	5	35.11	8.7	3.77	0.54	0.19	35	14.816	9.192	1	1	1	1	2	2	3692.13	3981.37	2	1
10752	53	5	2	1	3.43	35.97	5.8	0.27	0.71	0.1	14	11.657	6.772	1	1	1	1	2	2	9286.36	9357.58	2	1
52541	51	4	2	1	2.08	27.69	6.3	0.05	0.9	0.18	20	14.311	7.272	2	1	1	1	2	2	6371.79	6580.45	1	1
33634	50	3	2	1	1.59	29.95	5.7	0.04	1.78	0.49	28	13.115	6.384	1	1	1	1	2	2	7164.96	6921.41	2	1
51472	50	1	2	1	5	34.99	6.6	0.08	3.64	0.57	16	17.951	11.269	1	1	1	1	2	2	13121.8	13047.2	2	1
60569	49	3	2	1	0.77	21.99	8.4	0.56	0.69	0.31	45	16.225	9.112	1	2	1	1	2	2	9869.27	9557.32	2	1
53558	49	3	2	1	3.9	32.85	7	0.71	3.8	0.39	10	15.588	9.506	1	1	1	1	2	2	7397.06	8126.65	1	2
16863	48	3	2	1	4.91	29.06	6.1	0.92	0.9	0.26	29	10.158	5.072	2	2	1	1	2	2	9396.8	10323.6	2	1
15953	48	3	2	1	0.65	26.26	5.7	0.13	1.36	0.7	51	16.609	7.494	1	1	1	1	2	1	6933.44	6823.28	1	2
58322	47	3	2	1	0.78	30.05	11.8	0.55	1.69	0.51	30	21.741	13.711	1	1	1	1	2	2	8747.04	8960.3	2	1
56665	46	3	2	1	5	31.16	6	0.08	0.7	0.34	49	11.213	5.051	1	2	1	1	2	2	12164.2	12460.8	2	1
17923	46	1	2	1	1.83	35.85	10.2	0.51	1.6	0.74	46	20.373	12.544	2	2	1	1	2	2	11879	13050.6	2	1
44180	45	2	2	1	3.65	38.23	9	1.06	1.11	0.33	30	14.222	8.215	2	1	1	1	2	2	12164.2	12460.8	1	2
58573	43	5	2	1	5	26.37	5.5	0.1	1.65	0.51	31	11.213	7.105	2	1	1	1	2	2	52939.8	51794.7	2	1
57843	43	4	2	1	5	25.5	5.6	0.17	0.45	0.13	29	14.813	7.105	1	1	1	1	2	1	63955.3	68158.1	2	1
18070	43	3	2	1	2.95	31.69	5.5	0.15	1.46	0.22	15	12.874	6.939	1	1	1	1	2	2	66918.4	67282.7	2	1
18046	42	2	2	1	1.24	42.62	6.3	0.08	0.35	0.14	40	14.375	6.684	1	2	1	1	2	1	17290.3	17764.6	1	2
53055	41	4	2	1	3.98	35.38	6.2	0.11	9.57	1.09	11	15.552	9.373	2	2	1	1	2	2	63955.3	67382.5	2	1
10315	41	3	2	1	2.03	27.01	6.9	0.05	1.77	0.4	23	16.061	8.679	1	1	1	1	2	2	57793.1	57398.8	2	1
50732	40	4	2	1	1.02	50.49	7.1	0.03	2.18	0.66	30	9.125	4.552	2	1	1	1	2	2	16866.1	16689.1	1	1
10829	40	4	2	1	5	36.62	6.2	0.37	1.67	0.42	25	11.135	6.217	1	2	1	1	2	2	8135.5	8401.91	2	1
47637	40	1	2	1	1.12	46.24	8.8	0.57	2.19	1.02	47	13.427	7.86	2	1	1	1	2	2	4448.72	4733.54	2	1
20999	85	3	1	1	2.06	38.39	6.7	0.32	2.95	0.9	31	15.004	8.459	1	1	1	1	2	2	7479.36	7536.73	2	1
11562	85	1	1	1	0.83	37.51	9.9	0.1	4.39	0.88	20	14.044	7.85	2	2	1	1	2	2	8605.55	9279.71	2	1
39245	83	3	1	1	5	29.89	6.9	0.25	1.15	0.37	32	15.948	9.317	1	1	1	1	2	2	9286.36	9282.84	2	1
36119	83	2	1	1	0.66	27.47	7.2	0.14	1.83	0.81	44	14.485	7.938	1	1	1	1	2	2	9286.36	9357.58	1	1
51861	80	3	1	1	5	31.53	6.3	0.32	1.27	0.38	30	11.513	6.55	1	1	1	1	2	2	9769.35	10494.8	2	2
11801	80	3	1	1	2.86	28.29	7.2	3.13	1.17	0.27	23	15.746	8.685	2	1	1	1	2	2	7351	7118.65	2	1
58166	80	3	1	1	2.34	41.3	9.9	0.3	1.65	0.72	44	13.609	7.998	1	1	1	1	2	2	6302.97	7783.32	1	2
50113	80	3	1	1	2.27	46.26	5.3	0.83	1.53	0.62	41	10.858	5.662	2	2	1	1	2	2	13390.2	13264.9	2	1
60316	80	2	1	1	4.1	26.91	7	16	3.7	0.57	15	15.954	9.447	1	1	1	1	2	2	12001.3	12830.4	2	1
42696	78	3	1	1	2.04	29.1	6.4	1.29	0.55	0.19	35	13.729	6.162	1	1	1	1	2	1	7444.16	7428.91	2	1
43573	77	3	1	1	4.84	32.31	9.4	0.32	1.53	0.54	35	20.456	12.268	2	1	1	1	2	1	52300.7	51169.4	1	1
45632	76	3	1	1	5	34.08	6.8	0.57	2.85	0.43	15	11.654	6.661	2	2	1	1	2	2	38702.4	39017.3	2	1
52655	76	3	1	1	5	30.31	5.7	0.19	0.5	0.14	28	15.034	9.241	1	1	1	1	2	2	79310.1	78319.4	2	1
50341	76	3	1	1	1.95	31.78	7.6	0.35	1.97	0.23	12	15.418	7.159	1	1	1	1	2	1	60645.9	61321.3	2	1
45625	76	2	1	1	2.49	27.74	7.1	0.23	1.54	0.26	17	16.002	9.188	1	2	1	1	2	2	57262.8	56578.5	2	1
32167	75	3	1	1	0.61	32.67	7.1	1.26	0.4	0.12	30	15.942	8.707	2	2	1	1	2	2	27159.2	28322	2	1
39919	74	4	1	1	5	48.22	6.8	0.15	0.24	0.12	50	10.628	6.051	1	1	1	1	2	2	73323.9	72823.7	2	1
43962	74	3	1	1	1.25	26.51	4.7	0.05	1.4	0.27	19	13.1	6.384	2	1	1	1	2	2	7590.59	7733.84	2	2
52883	73	4	1	1	0.97	37.49	8.9	0.32	1.9	0.48	25	18.01	10.989	1	1	1	1	2	2	2325.81	2459.92	2	1
55413	71	3	1	1	1.13	30.71	9.9	1.62	1.36	0.75	55	15.985	8.612	2	1	1	1	2	2	7164.96	7399.59	2	2
41477	71	3	1	1	2.64	30.07	8.5	0.24	1.01	0.37	37	16.345	9.132	2	1	1	1	2	2	5913.06	6230.51	1	1
54744	70	3	1	1	5	32.15	13.7	0.86	6.82	1.4	21	28.992	20.095	2	2	1	1	2	2	6287.29	6866	2	1
40005	70	1	1	1	5	28.7	6.5	0.31	1	0.43	43	13.676	8.111	1	1	1	1	2	2	11320.9	12103	2	1
37050	69	4	1	1	1.68	28.68	10.5	1.54	3.4	1.09	32	16.084	7.486	1	2	1	1	2	1	14790.3	17649.6	2	1
60376	69	3	1	1	5	32.25	5.8	0.17	0.51	0.09	18	11.99	7.605	1	1	1	1	2	2	12460.1	13060	2	1
59612	69	2	1	1	1.77	33.85	7.8	0.52	0.47	0.15	32	14.549	7.882	1	1	1	1	2	2	12001.4	12579.3	1	2
52882	68	3	1	1	1.39	48.79	5.9	0.14	0.07	0.04	57	10.584	6.051	1	1	1	1	2	2	10549.8	11057.7	1	1
36617	68	3	1	1	4.43	32.26	4.7	0.5	1.69	0.63	37	15.988	9.574	2	1	1	1	2	2	8415.79	8282.08	2	1
38027	67	4	1	1	0.75	27.31	3.9	0.4	0.9	0.27	30	11.666	5.273	1	2	1	1	2	2	12164.2	12460.8	2	1
54139	67	4	1	1	0.86	30.74	7.1	1.13	0.25	0.09	36	17.293	10.38	1	1	1	1	2	2	18769.8	19650.9	1	2
60734	66	4	1	1	5	29.92	11.6	0.09	1.4	0.33	24	28.167	19.373	1	1	1	1	2	2	39670	38811.9	2	1
45060	66	3	1	1	3.93	42.4	7.3	0.49	1.39	0.42	30	10.373	3.997	1	1	1	1	2	1	61802	62036.5	1	2
44433	66	3	1	1	1.29	31.19	7.9	0.37	0.36	0.11	31	15.931	8.964	2	1	1	1	2	2	23784.9	24081.1	1	2
40353	66	3	1	1	1.46	30.22	12.1	0.14	1.26	0.54	43	31.03	26.09	2	1	1	1	2	1	57758.9	64097.9	1	2
34084	65	4	1	1	3.98	30.28	5.7	0.19	1.7	0.42	25	16.29	9.391	2	2	1	1	2	2	8742.77	8809.83	2	2
14823	64	5	1	1	3.66	27.19	6.9	0.05	0.7	0.19	27	16.784	9.726	2	1	1	1	2	2	7948.1	7907.71	2	1
60187	64	4	1	1	5	41.79	6.3	0.18	1.38	0.5	36	14.301	9.067	2	2	1	1	2	2	19455.2	19347.4	2	1
15403	64	4	1	1	5	34.66	7.9	2.25	6.41	0.4	6	15.892	8.15	2	1	1	1	2	1	25524.8	25584.4	2	1
47960	64	3	1	1	0.57	26.09	6.6	0.11	0.22	0.06	27	13.211	8.215	2	1	1	1	2	2	25798.1	25819.8	2	2
61178	64	2	1	1	1.41	23.31	8.3	0.24	1.1	0.27	25	20.941	12.561	2	1	1	1	2	2	22217	22697.4	2	1
37815	63	5	1	1	5	34.26	5.8	0.49	1.29	0.22	17	15.858	9.674	2	1	1	1	2	2	20697.8	21367.3	2	1
59881	63	4	1	1	1.6	31.6	4.6	0.07	0.96	0.25	26	14.961	8.475	1	2	1	1	2	2	63806.1	63922.8	2	1
12371	62	4	1	1	3.08	30.82	5.8	0.04	0.55	0.14	25	15.071	8.367	2	1	1	1	2	2	10114.5	10326.4	1	1
19099	62	4	1	1	5	34.36	8.9	0.45	1.13	0.28	25	15.67	8.075	1	1	1	1	2	1	11666.9	11695.7	2	2
42406	62	4	1	1	0.91	26.29	5.2	1.75	0.28	0.11	39	11.324	4.663	1	1	1	1	2	2	14112.2	14930.7	2	2
59869	62	1	1	1	0.41	29.88	11.7	0.94	0.23	0.12	52	24.879	15.598	2	1	1	1	2	2	68545.7	70430.1	2	1
53714	61	4	1	1	0.93	26.55	8.2	0.57	2.56	1.06	41	17.278	9.936	2	1	1	1	2	2	20691.5	21360.7	2	1
12977	61	4	1	1	2.47	37.55	7.7	0.76	0.69	0.15	22	16.402	9.659	2	2	1	1	2	2	20544.8	20506.2	2	1
11552	61	4	1	1	3.9	28.14	6.5	0.16	1.49	0.41	28	11.606	6.051	2	2	1	1	2	2	32380.3	32455.9	2	1
33696	61	3	1	1	5	27.98	6.3	0.06	0.39	0.13	33	16.002	9.801	1	2	1	1	2	2	21097.2	21246.8	2	1
57095	61	1	1	1	3.23	30.4	6.8	0.08	0.93	0.11	12	15.824	9.238	1	1	1	1	2	2	24008.3	25115.6	1	1
33467	60	3	1	1	3.85	37	5.6	0.14	0.13	0.04	31	15.912	10.093	2	1	1	1	2	2	16736.4	17247.6	2	1
51616	60	3	1	1	1.44	35.86	6.9	1.24	0.31	0.08	26	11.064	5.051	2	2	1	1	2	2	17672.9	18488	2	1
59437	60	1	1	1	4.37	40.6	7.9	0.55	0.54	0.22	41	23.936	14.488	1	2	1	1	2	1	22436.1	22311.8	2	1
41403	60	1	1	1	5	38.41	6.7	0.37	1.86	0.32	17	11.163	6.661	1	1	1	1	2	2	98237.7	103598	2	1
44866	59	3	1	1	1.29	32.82	6.3	0.04	0.24	0.1	42	12.785	6.772	1	1	1	1	2	2	22038.6	24126.1	2	1
32770	58	5	1	1	5	41.04	6.3	0.13	2.49	0.96	39	14.546	7.586	1	1	1	1	2	1	11086.9	11432.7	2	1
39229	57	4	1	1	5	26.55	6.8	0.05	3.77	1.52	40	14.857	8.826	2	1	1	1	2	2	13072.6	14353.1	2	1
51094	57	4	1	1	1.43	28.88	6	0.02	1.46	0.3	21	15.838	8.712	2	1	1	1	2	2	70355.1	71843.8	2	1
58520	56	4	1	1	2.75	42.71	6.3	0.6	0.86	0.16	19	13.865	8.251	1	1	1	1	2	2	20422.8	21503.1	2	2
54504	55	4	1	1	0.09	34.68	9.1	0.35	1.06	0.25	24	15.62	9.001	1	1	1	1	2	2	23122.2	23722.3	2	1
46221	55	3	1	1	3.05	38.57	7	0.07	0.34	0.08	24	10.801	5.662	1	1	1	1	2	2	102928	106749	2	1
20297	54	3	1	1	3.45	26.71	9.2	0.43	0.9	0.14	16	16.116	9.325	2	1	1	1	2	2	16528.9	17052.3	2	1
44578	53	3	1	1	1.83	31.91	9.2	0.79	1.72	0.44	26	21.833	13.6	2	1	1	1	2	2	16143	17724.4	2	1
48642	53	2	1	1	2.69	26.91	7.2	0.1	1.56	0.41	26	16.298	9.233	2	1	1	1	2	2	7524.41	9016.93	2	2
43415	52	3	1	1	0.8	35.33	7.2	0.75	0.38	0.09	24	15.041	8.271	1	1	1	1	2	2	9594.95	10053.4	1	1
61459	51	4	1	1	0.49	33.41	7.2	0.69	2.21	0.5	23	15.388	9.04	2	2	1	1	2	2	18792.6	19187.1	1	1
33307	51	4	1	1	1.25	54.93	6	0.1	0.33	0.14	42	12.402	7.561	2	1	1	1	2	2	17179.1	18035.6	2	1
53773	51	3	1	1	5	32.11	7.8	0.46	0.5	0.3	60	19.375	12.706	1	1	1	1	2	2	61233.7	62186.3	2	1
53532	51	3	1	1	1.03	41.59	13.6	0.61	0.63	0.2	32	28.088	19.817	1	1	1	1	2	2	23160.6	23031	2	2
11278	51	2	1	1	1.18	21.63	6.4	0.23	0.59	0.26	44	17.919	10.355	2	2	1	1	2	2	81663.2	89777.9	2	1
60090	51	1	1	1	1.98	35.94	7.4	1.17	0.42	0.16	38	15.199	8.655	1	1	1	1	2	2	24758.8	25683.7	2	2
42048	50	5	1	1	1.57	31.68	9.9	0.08	0.7	0.34	49	14.969	8.388	1	1	1	1	2	2	63875.1	66814.9	1	1
38494	50	3	1	1	0.79	29.76	7.2	0.3	3.01	0.25	8	15.705	8.54	1	1	1	1	2	2	10981.2	11008.4	2	1
59541	49	3	1	1	5	33.03	8.5	0.16	0.51	0.14	27	18.237	11.768	1	1	1	1	2	2	9300.99	10233.1	2	1
54551	47	1	1	1	1.94	37.14	10.2	0.52	0.55	0.23	42	16.249	9.935	2	2	1	1	2	2	12839.6	13666.9	1	1
58683	46	3	1	1	0.98	24.98	6.1	0.1	0.36	0.15	42	17.196	9.839	2	1	1	1	2	2	10114.5	10558.6	2	1
10004	46	3	1	1	3.73	29.51	6.5	0.71	0.54	0.14	26	16.269	9.551	1	1	1	1	2	2	22079.3	22778.6	2	1
37385	46	1	1	1	3.91	38.29	10	0.05	0.58	0.13	22	14.513	8.86	2	2	1	1	2	2	22118.5	21785.6	2	1
11679	45	4	1	1	2.75	27.47	7.3	0.02	1.2	0.27	23	15.621	8.689	1	1	1	1	2	2	16236.5	17046	2	1
49635	45	3	1	1	5	36.38	6.3	0.04	2.2	0.31	14	15.076	8.998	2	1	1	1	2	2	24008.3	25115.6	1	1
15962	44	3	1	1	0	30.05	6.4	0.56	0.85	0.39	46	15.53	8.713	1	1	1	1	2	2	12838.2	12664.2	2	1
34683	44	1	1	1	5	32.33	7	0.37	0.3	0.09	30	15.021	8.781	1	1	1	1	2	2	87147.8	90382.4	2	1
61242	43	3	1	1	0.09	22.57	5.4	0.05	0.63	0.3	48	11	4.718	1	1	1	1	2	2	23640.2	23508	2	1
60047	41	3	1	1	1.39	24.83	9	0.04	0.59	0.04	7	15.794	8.268	2	1	1	1	2	2	24437	25770.4	1	1
55666	41	3	1	1	2.47	30.41	6.8	0.11	0.89	0.29	33	13.805	7.216	1	1	1	1	2	2	101310	105071	2	2
16262	41	1	1	1	1.19	37.14	12.6	1.92	0.2	0.14	70	30.917	21.593	1	2	1	1	2	2	24155.2	25217.7	2	1
60817	40	4	1	1	1.02	31.73	7.6	0.29	1.63	0.44	27	11.224	5.495	2	1	1	1	2	2	23160.6	23031	1	2
12635	40	3	1	1	0.66	30.42	5.9	0.15	0.67	0.33	49	13.167	6.273	1	2	1	1	2	2	24217.1	24081.7	2	1
33454	84	4	1	1	1.01	32.02	7.2	0.18	0.5	0.17	34	14.106	7.417	2	1	1	1	2	2	27077.8	27202.1	2	1
16985	81	3	1	1	1.83	29.61	6.5	1.35	2.99	0.63	21	15.227	8.438	2	2	1	1	2	2	26892.1	29526.5	2	1
53186	80	3	1	1	0.16	29.4	7.7	0.08	0.5	0.18	36	15.962	8.345	2	1	1	1	2	2	14373.1	14426.4	1	1
48917	80	3	1	1	5	29.84	7.2	0.21	1.94	0.81	42	16.654	9.81	1	1	1	1	2	2	19113.1	19952.4	2	1
57599	80	3	1	1	3.32	26.79	11.8	0.36	0.58	0.16	28	24.395	15.931	2	1	1	1	2	2	20565.7	20527	2	2
61603	80	3	1	1	1.69	43.9	7.4	0.04	0.44	0.15	34	14.497	8.278	2	1	1	1	2	2	24008.3	24089.7	2	1
56812	80	3	1	1	0.32	25.01	9.9	0.12	0.89	0.3	34	16.175	8.603	1	1	1	1	2	2	16736.4	17220.6	2	2
44639	80	1	1	1	5	36.3	6	0.2	1.24	0.17	14	13.378	6.717	1	1	1	1	2	2	80151.8	82142.5	2	1
53101	78	4	1	1	0.56	34.04	12	1.68	0.4	0.15	38	15.026	8.468	2	1	1	1	2	2	89404.2	93518.9	2	2
37436	77	3	1	1	2.49	28.81	7.1	0.05	1.68	0.62	37	16.788	9.659	2	2	1	1	2	2	13811.7	14061.3	1	2
51747	77	1	1	1	1.71	26.11	9.6	0.14	1.24	0.33	27	20.317	12.157	1	1	1	1	2	2	20000.7	21259	2	1
49187	76	3	1	1	1.09	32.56	5.3	0.05	0.7	0.26	37	13.429	7.111	2	2	1	1	2	2	23018.9	23672.6	2	2
13749	75	4	1	1	3.73	32.6	7.2	0.52	1	0.16	16	15.221	9.054	1	1	1	1	2	2	27014.6	27309.4	2	1
19714	75	3	1	1	4.29	37.79	9.9	0.41	0.13	0.04	31	17.028	10.602	2	1	1	1	2	2	20000.3	21578.9	2	1
53947	74	3	1	1	4.92	29.59	6.8	0.34	0.75	0.15	20	13.05	6.939	1	1	1	1	2	2	19125.9	19043.8	2	1
56649	74	3	1	1	5	38.31	6.9	0.54	4.01	0.84	21	14.836	9.589	1	1	1	1	2	2	16377.7	16985.6	2	1
52741	73	3	1	1	5	35.43	7.2	0.27	3.52	0.52	15	16.844	10.769	2	1	1	1	2	2	86017.1	88381.7	1	1
54874	73	1	1	1	0.66	36.49	6.8	0.78	1.21	0.49	40	11.38	5.995	2	1	1	1	2	2	21595.5	21948.7	2	1
51195	72	3	1	1	3.39	26.13	6.8	0.21	0.89	0.39	44	20.399	13.1	1	1	1	1	2	2	28740.1	28792.7	1	2
43904	70	3	1	1	4.61	37.15	6	0.28	0.2	0.06	30	15.545	9.591	1	2	1	1	2	2	74568.1	78000	2	1
10106	70	1	1	1	4.24	39.99	7.1	1.11	2.86	0.46	16	15.136	9.234	1	1	1	1	2	2	80151.8	82142.5	2	2
60477	69	1	1	1	0.88	40.4	10.4	0.23	0.38	0.32	84	17.855	10.658	1	2	1	1	2	2	19113.1	19601.9	1	2
19097	67	4	1	1	1.79	27.08	6.8	0.09	0.44	0.06	14	16.114	8.919	2	1	1	1	2	2	11327.8	11355.8	2	1
60011	67	1	1	1	5	24.22	6.5	0.91	1	0.34	34	16.002	9.616	2	1	1	1	2	2	23942.5	25832.3	2	1
49618	66	4	1	1	2.91	26.7	6.6	0.37	0.99	0.22	22	13.138	6.55	1	1	1	1	2	2	27005.2	26859.3	2	1
41022	66	4	1	1	4.19	28.73	6.9	0.11	0.5	0.08	16	16.1	9.568	1	1	1	1	2	2	25251.7	25572.4	2	1
46807	66	3	1	1	3.13	29	6.3	0.33	2	0.47	24	15.287	9.372	1	1	1	1	2	2	50585.3	50592.8	2	2
45176	65	3	1	1	5	27.86	7.3	0.17	0.8	0.26	33	15.597	9.572	1	1	1	1	2	2	73172	74310.3	2	1
44233	65	1	1	1	3.63	52.65	7	0.75	0.72	0.17	24	12.627	7.753	1	1	1	1	2	2	90960.2	91691.3	1	1
52561	65	1	1	1	5	32.19	10.6	0.46	1.02	0.22	22	24.646	15.654	2	1	1	1	2	2	98473.7	100919	2	1
32984	64	4	1	1	1.52	31.52	10.5	0.38	0.28	0.09	32	15.707	8.874	2	1	1	1	2	2	80151.8	82142.5	1	2
51347	64	4	1	1	5	34.21	9.5	0.17	0.72	0.26	36	23.626	15.82	2	1	1	1	2	2	83459.2	83611.8	2	1
46497	64	4	1	1	0.5	36.26	5.8	0.7	0.81	0.4	49	14.545	7.938	2	1	1	1	2	2	24758.8	24804.1	2	1
19943	64	3	1	1	0.82	39.43	5.6	1.75	0.35	0.08	23	12.125	6.273	1	2	1	1	2	2	24098.3	24998.5	2	1
13724	64	1	1	1	2.16	37.74	7	0.17	0.3	0.08	27	14.686	8.462	1	1	1	1	2	2	16583.9	16841.9	2	1
58845	63	3	1	1	2.82	30.79	5.5	0.06	0.78	0.26	33	11.768	5.384	2	2	1	1	2	1	11835.8	12522.4	2	1
58841	63	1	1	1	3.13	25.74	4.4	0.11	0.71	0.17	24	11.158	7.05	1	1	1	1	2	2	18144	18866.3	2	2
18344	62	4	1	1	0.82	32.16	7.2	1.03	0.88	0.17	19	15.208	8.077	1	1	1	1	2	2	19113.1	19364.2	2	1
31348	62	4	1	1	0.39	28.13	8.7	0.27	0.55	0.27	49	15.085	8.215	2	2	1	1	2	2	17662.7	17971.3	2	1
53580	60	4	1	1	4.75	41.12	6	0.11	4.04	0.45	11	14.42	9.1	1	2	1	1	2	2	19455.2	20990.8	2	2
31796	60	4	1	1	0.74	53.39	13.9	1.34	0.49	0.11	22	12.716	7.779	1	1	1	1	2	2	20544.8	21078	1	1
52248	60	3	1	1	0.05	35.08	9.4	0.14	2.11	0.41	19	15.791	8.882	2	1	1	1	2	2	26344.8	27371.3	2	2
49732	57	5	1	1	5	32.88	8.7	0.13	0.11	0.05	45	19.599	12.823	1	1	1	1	2	2	88652	88814.1	1	1
18217	57	4	1	1	2.18	26.78	5	0.09	4.83	0.56	12	12.878	6.495	2	1	1	1	2	2	86017.1	88381.7	2	1
54291	57	4	1	1	0.75	45.91	5.5	0.13	0.45	0.16	36	13.892	7.827	1	1	1	1	2	2	24052.9	23918.3	1	2
13815	57	3	1	1	2.84	37.17	7.6	1.13	0.7	0.24	34	13.188	7.494	1	2	1	1	2	2	94535.8	105298	1	2
56712	55	3	1	1	4.54	32.15	9.1	0.52	1.08	0.15	14	16.231	10.269	1	1	1	1	2	2	11429.6	11822.1	2	1
33500	53	4	1	1	1.38	26.63	11.3	1.23	0.4	0.07	18	16.075	9.473	1	1	1	1	2	2	16583.9	16586.3	1	1
43624	53	4	1	1	1.94	24.79	8.6	0.1	0.22	0.13	59	16.393	8.8	1	1	1	1	2	2	14772.3	15296.7	2	2
47814	53	3	1	1	2.41	43.72	6.8	0.27	1.02	0.29	28	11.856	6.994	1	1	1	1	2	2	9420.99	10365.1	2	1
18906	53	3	1	1	3.71	26.13	7	0.12	1.13	0.19	17	19.787	12.323	1	2	1	1	2	2	12775.9	13174.4	2	1
14869	53	3	1	1	0	26.75	7	0.31	0.31	0.15	48	16.695	9.544	1	1	1	1	2	2	10114.5	10291.1	2	1
59000	53	1	1	1	2.04	36.66	7.1	0.23	0.51	0.23	45	15.4	7.105	1	1	1	1	2	1	16143	17312.5	1	1
60332	52	3	1	1	0.86	24.99	6.7	0.66	0.41	0.25	61	16.081	8.371	1	1	1	1	2	2	18272.3	18565.9	1	1
16661	50	4	1	1	1.98	26.67	5.9	1.77	2.4	1.04	43	15.94	8.913	1	1	1	1	2	2	20028.1	20542.7	2	1
42135	50	3	1	1	5	34.01	8.5	0.25	0.54	0.21	39	18.707	9.992	2	1	1	1	2	1	88102.8	89543.8	2	2
45368	50	2	1	1	5	29.69	5.7	0.12	0.45	0.27	60	15.106	9.27	1	1	1	1	2	2	67592.2	69682.3	2	1
56411	50	1	1	1	0.71	41.05	5.1	0.6	1.72	0.2	12	10.091	5.162	1	1	1	1	2	2	30802.5	31567.5	2	1
57009	49	4	1	1	2.73	30.78	5.8	1.96	0.75	0.18	24	15.801	9.358	2	1	1	1	2	2	84561	83545.5	2	1
41063	49	4	1	1	2.88	23.72	10.5	0.06	0.38	0.12	32	24.997	16.264	1	2	1	1	2	2	24672.3	24717.4	2	2
58474	49	2	1	1	3.39	33.4	7.3	0.61	1.22	0.38	31	18.81	11.546	1	1	1	1	2	2	14982.7	15296.6	1	1
40858	49	1	1	1	5	27.98	7.4	0.32	0.71	0.35	49	19.817	10.991	1	1	1	1	2	2	80696.2	83191.5	2	2
15069	46	1	1	1	0.64	32.4	6.8	0.23	0.72	0.09	13	16.004	7.383	1	1	1	1	2	1	16143	17312.5	2	1
51885	43	2	1	1	5	39.15	7.2	0.28	0.63	0.37	59	16.491	10.214	1	1	1	1	2	2	19113.1	20417.2	2	1
10264	42	3	1	1	2.17	31.85	5.7	0.29	1.35	0.38	28	15.815	8.752	1	1	1	1	2	2	17662.7	18114.4	2	2
45216	41	3	1	1	0.78	31.42	6.2	0.2	0.25	0.14	56	14.732	8.701	1	1	1	1	2	2	25280.9	25460.2	1	1
40131	85	3	1	1	5	35.5	7.5	0.3	0.57	0.27	47	14.684	9.087	2	1	1	1	2	2	22437.3	22585.1	2	2
16346	85	3	1	1	2.88	35.51	5.6	0.23	0.44	0.15	34	13.24	5.94	2	2	1	1	2	1	20349.2	21997.1	2	1
14291	85	1	1	1	0.84	28.28	8.5	1.24	1.15	0.23	20	15.15	8.567	1	1	1	1	2	2	24659.7	25620.5	2	1
37562	84	2	1	1	1.42	23.5	6	0.12	1.45	0.15	10	11.049	5.273	1	1	1	1	2	2	38539.5	38325.9	2	1
13838	82	3	1	1	3.98	45.27	6.5	1.27	0.87	0.15	17	10.595	6.661	1	2	1	1	2	2	25524.8	26584.7	2	2
38900	82	1	1	1	0.77	26.51	15.2	0.27	0.45	0.12	27	16.322	9.447	1	1	1	1	2	2	23313.3	23184.1	2	1
38696	82	1	1	1	0.61	34.18	7.3	0.26	0.87	0.25	29	15.152	8.085	2	1	1	1	2	2	23982.4	24063.7	2	1
50832	80	3	1	1	2.83	28.87	7.2	0.23	0.53	0.2	38	15.837	9.099	1	1	1	1	2	2	24472.8	24690.5	2	2
43738	80	3	1	1	0.91	64.16	6.8	1.79	0.7	0.19	27	12.685	8.339	1	2	1	1	2	2	89676.6	94088.4	2	1
55766	80	3	1	1	1.11	30.88	7.1	0.88	0.61	0.37	61	17.612	10.38	1	1	1	1	2	2	16948	16822.5	2	1
49181	80	3	1	1	5	39.6	10.8	0.18	0.51	0.35	69	15.602	10.214	2	1	1	1	2	2	66874.9	70395.7	2	1
36414	80	3	1	1	5	33.18	5.5	0.16	0.54	0.3	56	15.731	9.646	2	1	1	1	2	2	65037.5	67328.8	2	2
15351	80	1	1	1	2.88	34.44	12.9	0.8	0.4	0.11	28	14.952	8.742	1	1	1	1	2	2	94308.3	97630.9	1	2
35273	79	3	1	1	1.91	34.6	6	0.23	0.37	0.04	11	15.069	8.64	1	1	1	1	2	2	79514.6	80281.9	2	2
49086	79	1	1	1	0.51	35.42	6.7	1.3	0.65	0.22	34	13.238	6.994	1	1	1	1	2	2	31268.9	31262.9	2	1
45491	78	3	1	1	2.83	35.84	8.4	0.3	1.3	0.25	19	16.764	10.444	2	1	1	1	2	2	10584.7	11191.2	2	1
44062	77	1	1	1	0.09	23.95	6.9	0.21	1.1	0.16	15	18.651	6.994	1	1	1	1	2	1	19712.4	19992.8	2	2
36586	76	4	1	1	3.57	26.51	12.3	0.38	0.41	0.14	34	15.45	8.536	1	1	1	1	2	2	22356.4	22314.4	1	2
32743	75	5	1	1	3.73	33.68	10	1.22	0.5	0.18	36	15.362	9.191	2	2	1	1	2	2	74082	75234.5	2	1
37492	75	4	1	1	3.09	33.9	6.1	0.53	0.96	0.24	25	15.37	8.737	2	2	1	1	2	2	17322.2	18504.1	2	1
53301	74	4	1	1	2.12	22.71	7.7	0.02	3.04	0.42	14	16.457	9.048	2	1	1	1	2	2	16343.2	17396.2	2	2
17629	74	1	1	1	4.27	28.71	7.5	0.04	6.92	0.35	5	15.673	8.951	1	2	1	1	2	2	72739.3	72879	2	1
52337	72	3	1	1	1.84	35.8	6.8	0.21	0.8	0.23	29	14.09	8.011	2	1	1	1	2	2	14951.1	15807.9	2	1
15679	72	1	1	1	2.18	56.21	8	1.18	0.45	0.16	36	12.725	7.993	2	1	1	1	2	2	19584.7	19842	2	1
18224	72	1	1	1	2.71	35.67	5.8	0.2	1.48	0.37	25	12.295	6.328	2	1	1	1	2	2	15319.9	15587.5	2	1
14303	72	1	1	1	3.5	41.63	7.8	0.14	0.35	0.12	34	18.267	11.546	2	1	1	1	2	2	23408	24916.2	2	1
51267	71	5	1	1	0	27.83	11.2	0.02	1.04	0.43	41	18.783	11.435	2	2	1	1	2	2	16736.4	17388.5	2	1
50949	71	1	1	1	1.43	29.06	5.6	0.36	1.96	0.44	22	16.607	9.682	2	2	1	1	2	2	26885.3	29007.5	2	1
54788	70	3	1	1	4.64	40.93	7.9	0.54	1.4	0.73	52	13.984	8.711	2	1	1	1	2	2	89676.6	91889.4	2	1
48557	70	2	1	1	1.65	30.37	5.7	0.16	2.8	0.33	12	13.333	7.05	2	2	1	1	2	2	119667	119644	1	2
32022	70	1	1	1	5	40.35	9.2	0.69	0.31	0.18	58	19.202	12.545	1	1	1	1	2	2	62356	63242.7	1	1
60877	69	2	1	1	3.82	37.14	5.8	1.81	0.96	0.28	29	12.119	6.495	1	1	1	1	2	2	84515	85741.1	2	2
51282	69	2	1	1	1.36	25.87	6.9	0.97	0.97	0.25	26	16.607	9.27	1	1	1	1	2	2	15419.8	15643.5	2	1
18079	69	1	1	1	5	26.97	7.3	0.18	0.1	0.04	40	18.006	11.228	1	1	1	1	2	2	92962.9	95602.7	2	1
51730	68	5	1	1	1.99	30.64	6.2	4.75	0.37	0.15	41	15.134	8.555	1	1	1	1	2	2	27982.1	28516.6	2	1
51180	68	1	1	1	5	57.5	6.9	0.91	0.4	0.15	38	12.036	8.017	1	1	1	1	2	2	10412.5	11996.4	2	1
15660	68	1	1	1	3.95	27.7	6.3	0.08	1	0.31	31	16.82	10.62	2	1	1	1	2	2	13682.6	14115.9	2	1
58656	68	1	1	1	0.75	25.48	5.2	0.33	0.56	0.15	27	8.093	2.831	1	1	1	1	2	2	21427.9	21578.7	2	1
54866	67	5	1	1	1.37	40.91	6.2	0.58	0.49	0.24	49	12.323	9.048	1	1	1	1	2	2	22079.3	22778.6	2	1
16131	67	1	1	1	1.49	37.1	7.7	1.32	0.9	0.33	37	21.462	13.655	2	2	1	1	2	2	116710	120767	1	2
53114	66	1	1	1	1.94	30.27	6.1	0.41	0.3	0.1	33	11.135	5.772	1	1	1	1	2	2	15820.5	15815.8	2	2
58112	65	2	1	1	1.04	35.3	6.2	0.13	0.34	0.15	44	14.417	8.013	1	1	1	1	2	2	31673.8	31667.7	2	1
47169	64	1	1	1	4.17	31.16	6.6	0.13	0.69	0.14	20	12.905	7.272	1	1	1	1	2	2	20256.9	21063.3	2	1
34319	63	4	1	1	5	25.68	6.5	0.1	1.84	0.41	22	11.759	6.384	2	1	1	1	2	2	16736.4	17388.5	2	1
45819	63	4	1	1	0.66	26.6	6.8	0.2	0.34	0.17	50	16.52	9.546	1	1	1	1	2	2	23882.6	24072	2	2
51019	63	2	1	1	3.63	29.76	5.5	0.17	0.47	0.14	30	15.265	7.272	2	1	1	1	2	2	90370.2	93752.3	2	1
54439	63	1	1	1	0.52	36.46	8.9	0.19	0.25	0.08	32	14.101	7.696	2	1	1	1	2	2	115169	119480	2	1
20918	63	1	1	1	1.26	45.69	7.5	0.4	0.3	0.04	13	15.418	9.428	2	2	1	1	2	2	35236.7	36237.3	1	2
52134	61	3	1	1	3.14	35.86	8.3	0.21	1.48	0.52	35	15.193	9.191	2	1	1	1	2	2	22356.4	22432.2	2	1
20064	60	1	1	1	2.18	22.14	15.5	0.21	0.53	0.11	21	27.121	17.541	2	1	1	1	2	2	19584.7	20257.2	2	1
59992	56	1	1	1	5	28.72	6.3	0.09	1.11	0.53	48	16.797	10.402	2	1	1	1	2	2	57669.4	60205.1	2	2
51748	56	1	1	1	3.38	32.9	5.5	0.77	0.7	0.3	43	15.809	9.274	1	1	1	1	2	2	41040.6	42238.4	2	1
35017	56	1	1	1	2.12	30.56	8.9	0.25	0.75	0.3	40	24.101	16.153	2	1	1	1	2	2	23869.6	23928.6	2	1
60650	55	3	1	1	1.89	26.7	6.2	0.25	0.6	0.28	47	15.844	8.893	2	2	1	1	2	2	90309.8	92538.2	2	1
45675	55	2	1	1	0.76	27.49	11.9	0.07	0.33	0.26	79	27.366	19.928	1	1	1	1	2	2	20746.6	21277.2	2	2
45853	54	1	1	1	0.86	28.97	11.2	0.21	1.2	0.21	18	16.067	8.691	2	1	1	1	2	2	9219.78	10194.3	2	1
33076	54	1	1	1	2.76	27.92	7.7	0.12	0.2	0.14	70	16.392	9.639	2	1	1	1	2	2	19302.4	19648.5	2	1
45973	53	2	1	1	2.68	39.87	11.8	1.15	0.7	0.22	31	21.575	14.766	1	1	1	1	2	2	26539.7	26396.2	2	1
44042	52	1	1	1	1.65	41.98	9.2	0.8	0.46	0.14	30	14.014	8.096	2	2	1	1	2	2	32380.3	33724.8	2	1
42189	50	1	1	1	2.91	37.58	6	0.38	0.35	0.09	26	14.856	8.486	2	1	1	1	2	2	65472.7	65879	2	1
60229	50	1	1	1	1.47	29.22	5.5	0.39	0.46	0.04	9	12.157	6.495	2	1	1	1	2	2	16110.4	16150.2	2	1
35785	49	1	1	1	5	29.89	12.5	0.34	0.4	0.1	25	31.03	23.703	2	2	1	1	2	2	25280.9	25460.2	2	1
34256	48	1	1	1	2	39.4	6.1	0.89	0.5	0.26	52	11.682	6.344	1	1	1	1	2	2	21730.1	22222.7	2	1
44882	47	3	1	1	1.74	25.24	11.2	0.52	1.03	0.14	14	16.738	9.686	2	1	1	1	2	2	23982.4	23879.5	2	2
53124	52	3	2	1	2.45	28.48	6.5	0.56	1.36	0.57	42	14.544	7.716	1	1	1	1	1	2	20926	22984.6	2	1
51346	53	1	1	1	2.96	28.93	5.6	0.14	2.44	0.75	31	15.457	7.467	1	1	1	1	1	1	21792.4	22608.5	2	1
59106	72	5	3	2	0.64	32.29	8.1	0.77	1.8	0.49	27	15.515	8.566	2	2	1	1	1	2	9771.94	11700.8	1	2
41699	51	4	2	2	2.04	31.27	12.2	0.27	0.17	0.04	24	16.033	7.563	1	1	1	1	1	1	10178	11133.3	1	1
35810	51	4	2	2	1.55	31.58	6.6	0.29	0.2	0.1	50	17.782	10.214	1	1	1	1	1	2	10237.7	11447.2	1	2
44276	76	3	1	2	3.43	34.74	6	0.39	0.35	0.22	63	15.206	7.531	1	1	1	1	1	1	20784.2	21012.9	2	1
32038	61	1	1	2	2.25	29.51	8.3	0.19	35.76	2.85	8	20.15	11.546	1	1	1	1	1	2	17261.5	18467.3	2	2
49069	58	2	1	2	3.43	30.23	7	0.03	5.35	2.1	39	13.638	7.05	2	1	1	1	1	2	21378.3	21791.1	2	1
55282	56	1	1	2	4.94	29.34	6.7	0.28	15.42	4.35	28	15.172	8.493	2	1	1	1	1	2	20593.7	22127.7	2	1
45261	42	1	1	2	2.55	24.51	5.6	0.15	0.07	0.04	57	15.673	8.805	1	1	1	1	1	2	27090.2	27832.8	2	1
37278	77	3	1	2	2.4	25.47	7.3	0.15	12.24	1.05	9	17.032	9.437	1	2	1	1	1	2	21378.3	22970.7	2	1
44290	71	4	1	2	1.21	31.84	5.9	0.08	1.9	0.62	33	13.685	6.772	1	1	1	1	1	2	15204.3	15798.6	2	1
38314	44	2	1	2	2.06	19.53	6.8	0.38	3.87	0.32	8	12.767	7.105	1	1	1	1	1	2	21842.2	23469.1	2	2
47712	43	1	1	2	1.7	27.5	6.3	0.23	1.51	0.34	23	16.016	8.444	1	1	1	1	1	2	10676.1	10987.3	2	1
19595	73	3	3	2	2.27	35.44	6.5	0.16	2.08	0.91	44	14.266	7.969	1	1	1	1	1	2	23406.1	23841.2	2	1
41613	71	4	3	2	1.23	24.94	6.4	0.07	3.18	0.39	12	14.766	6.828	1	1	1	1	1	1	14761.4	15674.1	2	1
45215	71	3	2	2	5	30.42	7.1	0.11	0.2	0.06	30	15.694	9.169	2	1	1	1	1	2	10273.8	11278.5	1	1
58986	48	2	1	2	2.06	21.21	9.7	0.71	1.32	0.24	18	14.726	7.216	1	1	1	1	1	2	35221.9	35141.5	1	1
51702	44	3	1	2	2.24	22.99	6	1.13	0.6	0.23	38	16.626	9.358	1	1	1	1	1	2	12708.6	12478.6	2	1
45057	79	1	3	2	5	28.17	6.4	0.1	0.26	0.17	65	14.886	7.272	1	1	1	1	1	1	7153.39	7507.23	2	1
48086	75	3	2	2	1.03	26.33	6.7	0.95	4.9	0.59	12	14.498	7.851	1	1	1	1	1	2	36625.3	38632	2	1
49561	62	3	2	2	1.03	22.29	5.7	0.43	0.29	0.08	28	16.204	8.209	1	1	1	1	1	2	10077.3	10249.5	1	1
50985	52	2	2	2	5	27.46	6	0.23	1.4	0.38	27	14.579	8.661	1	1	1	1	1	2	30600.8	32652.8	2	1
49393	49	4	2	2	1.52	43.79	6.6	0.25	0.29	0.16	55	14.526	8.16	2	1	1	1	1	2	18910.4	22062.1	1	1
39906	78	4	1	2	0.84	32.05	7.8	0.47	0.35	0.16	46	15.725	8.778	1	2	1	1	1	2	10740.7	10546.3	1	2
45462	69	3	1	2	3.13	25.75	4.9	0.56	0.66	0.2	30	11.602	6.384	1	1	1	1	1	2	52851.2	56625.7	2	1
59666	66	4	1	2	2.19	26.36	5.9	0.4	0.63	0.22	35	15.432	5.995	2	1	1	1	1	2	26604	26120	2	2
50593	52	3	1	2	2.14	33.47	6.7	1.51	0.75	0.2	27	13.766	6.883	1	1	1	1	1	1	11018.7	12705.9	2	1
15664	70	3	1	2	1.66	34.51	6.4	0.11	1.59	0.8	50	15.773	7.105	2	2	1	1	1	1	7661.38	7686.46	2	1
58045	68	1	1	2	4.64	27.56	6.2	0.24	1.45	0.7	48	11.158	5.995	2	1	1	1	1	2	36500.6	36926.9	2	1
46293	68	1	1	2	5	32	5.7	0.19	0.8	0.27	34	12.579	7.283	2	1	1	1	1	2	28823	34512.2	2	1
61213	63	3	1	2	1.19	32.45	5.9	1.08	4.77	2.29	48	14.935	8.675	1	1	1	1	1	2	18301.2	21351.4	2	1
31625	63	1	1	2	1.79	23.39	7.1	1.34	0.56	0.05	9	16.689	7.536	2	1	1	1	1	1	39324.9	45879	2	1
57744	55	1	1	2	0.41	41.27	8.5	0.62	1.82	0.37	20	14.464	7.748	1	2	1	1	1	2	9644.77	10143.7	1	1
13069	85	3	3	2	1.36	28.05	8.3	0.1	0.5	0.15	30	18.672	10.772	2	1	1	1	1	2	3062.63	3647.97	2	1
10494	78	3	3	2	5	31.11	5.4	0.24	0.94	0.32	34	11.602	6.384	1	1	1	1	1	2	31795	31722.5	2	2
57050	78	2	3	2	5	28.03	5.8	0.22	0.89	0.19	21	12.989	6.217	1	1	1	1	1	1	33006.3	33337.8	2	1
43813	73	3	3	2	3.15	27.68	7.7	0.33	3.02	0.49	16	15.818	7.519	1	1	1	1	1	1	9935.27	10243.7	2	1
37792	50	1	3	2	2.35	32.71	5.5	0.12	1.74	0.24	14	14.626	8.646	1	1	1	1	1	2	30052.8	29781.7	2	1
56262	49	3	3	2	3.42	24.81	5.3	9.51	0.31	0.13	42	11.713	6.495	1	2	1	1	1	2	31471.1	32702	2	1
45649	73	3	2	2	4.2	33.66	7.7	0.11	0.71	0.21	30	15.543	10.269	1	1	1	1	1	2	9935.27	9754.51	2	1
53289	71	3	2	2	3.94	28.41	6.7	0.71	1.8	0.31	17	17.028	10.311	1	1	1	1	1	2	23624.1	28287.2	2	1
42124	66	4	2	2	0.87	30.82	6.7	4.28	0.6	0.09	15	15.265	6.663	2	1	1	1	1	1	6233.79	6466.68	1	1
18616	60	4	2	2	1.12	30.29	6.3	1.15	2.45	0.35	14	12.876	6.717	1	2	1	1	1	2	12708.6	13086.2	2	1
53178	80	3	1	2	1.7	24.89	6.6	0.18	0.38	0.13	34	16.804	9.594	1	2	1	1	1	2	11265.9	11060.9	2	1
35312	52	3	1	2	0.92	30.96	7.9	0.06	1.64	1.03	63	16.609	9.104	2	1	1	1	1	2	7996.9	8328.45	1	2
47868	72	4	3	1	5	33.02	5.2	0.02	1.06	0.58	55	15.335	8.87	1	1	1	1	1	2	56052.8	56750.7	2	1
19823	66	4	3	1	5	41.41	6.3	0.16	1.7	0.62	36	13.017	8.061	1	1	1	1	1	2	5757.76	6175.59	2	1
59236	64	3	3	1	4.8	39.28	7.9	0.09	1.38	0.42	30	14.225	8.339	1	1	1	1	1	2	54601.4	54228.9	1	1
19412	63	5	3	1	2.03	26.76	6.4	0.02	2.25	0.86	38	16.435	7.645	1	2	1	1	1	1	79633.3	78681.8	2	2
42900	63	4	3	1	1.71	65.37	8	0.18	0.16	0.08	50	10.744	6.606	1	1	1	1	1	2	61587.5	61442.9	1	2
37558	62	3	3	1	0.98	28.12	5.3	0.86	0.36	0.2	56	16.159	8.451	1	2	1	1	1	2	8742.77	8445.59	2	1
53372	61	4	3	1	2.71	25.37	6.2	0.49	0.46	0.1	22	16.167	7.327	1	1	1	1	1	1	7799.13	8415.55	2	2
42460	59	4	3	1	5	35.77	7.4	0.31	0.88	0.31	35	19.91	12.712	1	1	1	1	1	2	57793.1	57398.8	1	2
56099	59	1	3	1	2.34	26.77	5.3	0.57	2.64	0.32	12	16.137	7.475	1	1	1	1	1	1	70216.9	70999	1	1
60124	54	4	3	1	0.44	39.34	5.8	0.92	0.84	0.29	35	13.556	7.393	1	1	1	1	1	2	12040.8	15643.8	2	1
58343	50	3	3	1	5	44.41	6.8	0.03	0.89	0.54	61	11.443	6.439	2	2	1	1	1	2	49602.9	54062.1	2	1
38565	42	4	3	1	2.41	26.3	6.5	0.56	2.78	0.75	27	14.044	8.715	2	2	1	1	1	2	54670.9	53488.3	2	2
19051	41	4	3	1	2.42	29.22	5.8	0.09	2.93	0.97	33	16.32	7.327	1	1	1	1	1	1	67421.6	67849.1	2	1
34395	41	4	3	1	0.91	35.68	5.4	1.34	1.57	0.81	52	14.704	8.37	1	1	1	1	1	2	31962	37090.6	2	1
19908	41	3	3	1	0.94	26.72	11.4	0.18	1.86	0.84	45	25.141	15.876	1	1	1	1	1	2	19043.7	20518.5	2	1
46011	41	3	3	1	5	22.24	6.5	0.19	0.85	0.35	41	16.464	8.24	1	1	1	1	1	1	10865.5	11716.8	1	1
41522	72	3	2	1	2.43	35.39	8.1	0.67	1	0.18	18	14.989	8.619	2	2	1	1	1	2	49351.4	52055.4	2	1
47986	71	3	2	1	5	38.68	5.9	0.23	1.71	0.69	40	14.652	8.648	1	1	1	1	1	2	51329.7	53739.2	2	1
58996	70	3	2	1	1.41	31.35	8.4	0.47	0.78	0.26	33	16.095	8.638	2	2	1	1	1	2	8742.77	8809.83	2	1
38543	67	1	2	1	3.46	32.86	6.7	0.04	0.3	0.19	63	15.334	8.893	1	1	1	1	1	2	9217.77	9343.29	2	1
12617	65	3	2	1	2.2	33.42	6.5	0.36	2.09	0.79	38	12.878	7.05	1	1	1	1	1	2	47011.2	47596.5	2	2
33114	64	3	2	1	2.14	31.1	7	0.04	0.16	0.07	44	16.606	7.993	1	1	1	1	1	1	61587.5	70768.8	2	1
19837	55	4	2	1	1.24	28.6	8.1	0.93	5.53	0.91	16	14.613	7.992	1	1	1	1	1	2	16338.9	20384.3	2	1
62048	55	4	2	1	1.75	40.78	6	0.4	1.45	0.66	46	12.008	6.661	1	1	1	1	1	2	40027	40646.4	1	2
37892	55	1	2	1	1.63	31.71	7.4	0.03	0.51	0.2	39	15.723	8.438	1	1	1	1	1	2	49457.5	48938.3	2	1
10277	54	2	2	1	5	29.95	7.3	0.19	0.46	0.24	52	15.389	8.771	1	1	1	1	1	2	6971.81	6969.17	2	1
11432	52	3	2	1	2.49	36.4	9	0.24	0.98	0.37	38	21.765	13.711	1	1	1	1	1	2	5482.66	5662.2	2	1
10601	50	3	2	1	1.19	39.74	8	0.06	2.93	1.16	40	14.331	7.982	1	1	1	1	1	2	15068.7	13622.6	2	1
54324	50	2	2	1	2.08	27.02	5.7	0.03	2.54	1.01	40	15.98	8.88	1	1	1	1	1	2	12193.3	11477.2	2	1
43281	46	3	2	1	1.35	39.4	7	0.43	0.3	0.1	33	13.063	7.222	1	1	1	1	1	2	10735.3	11794.1	2	1
36408	42	1	2	1	5	39.95	7.2	0.18	3.1	0.81	26	12.91	6.162	1	1	1	1	1	1	49331	48263.9	1	1
42948	41	3	2	1	0.62	28.94	6.2	7.66	1.35	0.49	36	15.207	7.716	1	1	1	1	1	2	20558.1	22814.4	2	1
15712	77	3	1	1	1.42	25.27	6.8	0.75	0.4	0.15	38	14.22	7.3	1	1	1	1	1	2	8697.35	9549.36	2	1
33543	76	3	1	1	4.75	36.37	7.1	0.36	1.14	0.22	19	13.021	7.771	2	2	1	1	1	2	63205.8	61838.5	2	1
33093	74	3	1	1	4.64	33.01	9.6	0.23	0.34	0.12	35	18.826	11.657	1	1	1	1	1	2	5848.9	6223.35	1	1
35614	73	3	1	1	1.17	29.52	8.2	0.16	1.61	0.64	40	15.335	8.61	1	2	1	1	1	2	5287.57	4977.05	1	1
50424	71	3	1	1	1.17	33.01	8.1	0.1	1.9	0.5	26	15.371	8.38	2	1	1	1	1	2	3251.36	2939.33	1	1
59095	68	4	1	1	1.24	31.05	8.3	1.02	0.18	0.09	50	15.944	8.604	1	1	1	1	1	2	7222.08	7269.77	1	1
58008	68	2	1	1	3.63	38.06	6.6	0.3	1.13	0.13	12	14.628	8.714	1	1	1	1	1	2	7764.79	8341.37	2	1
54270	66	2	1	1	1.89	42.46	7	0.42	1.57	0.32	20	14.726	8.549	1	1	1	1	1	2	31962	31580.1	1	1
42421	55	1	1	1	3.01	40.94	7.4	1.86	0.8	0.26	33	14.682	8.761	1	1	1	1	1	2	63875.1	64980.2	2	1
33802	49	3	1	1	1.59	26.59	10	0.5	1.2	0.45	38	14.912	8.205	1	1	1	1	1	2	13507.9	13774.5	1	2
51304	47	4	1	1	2.49	28.31	10.2	1.95	0.94	0.18	19	23.59	14.71	1	1	1	1	1	2	12475	12903.4	2	1
33154	46	1	1	1	3.93	36.74	6.9	0.82	0.79	0.51	65	14.632	8.357	2	2	1	1	1	2	20544.8	20544.1	1	2
44261	45	3	1	1	2.33	26.51	6.1	0.46	0.7	0.2	29	16.137	9.907	1	2	1	1	1	2	20922	21194.9	2	1
39328	45	1	1	1	1.92	40.37	6.5	3.13	1.26	0.4	32	13.554	7.351	1	1	1	1	1	2	24699.8	25931.2	2	1
38970	82	4	1	1	1.87	34.93	6.2	1.44	1.24	0.41	33	15.37	8.713	1	2	1	1	1	2	11184.7	11386.8	1	1
12188	72	3	1	1	0.71	39.77	8.4	1.34	0.39	0.13	33	14.481	8.579	1	1	1	1	1	2	28740.1	28792.7	1	1
38065	66	4	1	1	0.78	38.96	6.2	5.18	6.8	0.85	13	14.245	8.465	1	1	1	1	1	2	22436.1	24207	1	2
41870	59	1	1	1	1.3	38.8	5.8	0.54	1.38	0.32	23	11.194	5.607	1	1	1	1	1	2	26077.3	25932.8	2	1
13866	53	2	1	1	2.26	23.68	12	1.06	1.31	0.28	21	20.301	12.379	1	1	1	1	1	2	10385.5	10689.5	2	1
44883	50	4	1	1	1.26	31.45	8.2	0.27	0.6	0.24	40	12.084	5.967	1	2	1	1	1	2	27014.6	27598.6	1	2
17224	83	3	1	1	3.29	32.72	5.9	0.19	1.47	0.31	21	14.962	8.258	2	1	1	1	1	2	20561.7	20282.9	2	1
49585	78	5	1	1	0.65	23.03	7.2	0.69	3.6	0.43	12	17.255	7.995	1	2	1	1	1	1	36767.1	37469.4	2	1
60270	75	5	1	1	5	38.61	5.8	0.07	0.16	0.05	31	14.196	7.105	1	1	1	1	1	1	90370.2	93752.3	2	1
12485	75	4	1	1	0.92	30.92	9.2	2.33	0.55	0.19	35	22.962	14.599	1	2	1	1	1	2	43197.7	43091.5	1	2
58209	75	1	1	1	0.88	30.02	8.7	1.14	1.13	0.5	44	23.199	14.766	2	1	1	1	1	2	20137	21021.2	2	1
52848	73	1	1	1	1.02	50.46	8.1	0.28	0.18	0.11	61	13.047	7.422	1	1	1	1	1	2	33936.6	35357.9	2	1
59580	63	1	1	1	1.81	31.43	8.9	0.46	0.4	0.15	38	15.246	8.106	1	1	1	1	1	2	62356	62475.7	2	1
57023	55	1	1	1	0.51	46.04	8.9	2.64	0.15	0.06	40	7.327	2.498	1	1	1	1	1	2	19018.4	19620.8	1	2
17968	42	3	1	1	3.11	36.39	6.3	1.08	0.81	0.34	42	11.824	5.718	1	1	1	1	1	2	84515	85741.1	2	1
