# Supplementary material for: Glycemic Control and Prostate Antigen Levels in Individuals with Diabetes Based on NHANES Data
Source: Research Square preprint supplement (doi:10.21203/rs.3.rs-5674422/v1), 2025-03-31
Supplement: Supplementary file 2 [file 0e8d0978523ea8c89c6b3751.docx]

**Table Legends**

**Supplementary Table 1**. Baseline characteristics of the 1,025 adults with diabetes included in the study, stratified by glycemic control status (HbA1c < 7% vs. HbA1c ≥ 7%). Data are presented as mean ± standard deviation (SD) for continuous variables and n (%) for categorical variables. P-values indicate differences between groups, with statistical significance set at P < 0.05.

**Abbreviations**: SD, standard deviation; PIR, poverty income ratio; BMI, body mass index; HbA1c, hemoglobin A1c; CRP, C-reactive protein; tPSA, total prostate-specific antigen; and OGTT, oral glucose tolerance test.

**Supplementary Table 2**. Subgroup analysis of the association between HbA1c and total prostate-specific antigen (tPSA) levels among participants with diabetes, stratified by glycemic control (HbA1c < 7% vs. HbA1c ≥ 7%). Beta coefficients (β) with 95% confidence intervals (CI) are presented for each subgroup. P-values indicate the significance of associations within each subgroup, while P for interaction assesses potential effect modifications.

**Abbreviations**: β, beta coefficient; PIR, poverty income ratio; BMI, body mass index.
